1 **Perception of a conserved family of plant signalling peptides by the receptor kinase HSL3**

2

3 Jack Rhodes<sup>1</sup>, Andra-Octavia Roman<sup>3</sup>, Marta Bjornson<sup>2</sup>, Benjamin Brandt<sup>2,5</sup>, Paul Derbyshire<sup>1</sup>,

4 Michele Wyler<sup>4</sup>, Marc Schmid<sup>4</sup>, Frank L.H. Menke<sup>1</sup>, Julia Santiago<sup>3</sup> and Cyril Zipfel<sup>1,2</sup>

5

6 <sup>1</sup>The Sainsbury Laboratory, University of East Anglia, Norwich Research Park, NR4 7UH,

7 Norwich, United Kingdom.

8 <sup>2</sup>Institute of Plant and Microbial Biology, Zurich-Basel Plant Science Center, University of

9 Zurich, 8008 Zurich, Switzerland.

10 <sup>3</sup>The Plant Signaling Mechanisms Laboratory, Department of Plant Molecular Biology,

11 University of Lausanne, 1015 Lausanne, Switzerland.

12 <sup>4</sup>MWSchmid GmbH, 8750 Glarus, Switzerland.

13 <sup>5</sup>Present address: Biozentrum der Ludwig-Maximilians-Universität München, Department

14 Biologie I – Botanik, 82152 Planegg-Martinsried, Germany.

15

16 \*Correspondence: Cyril Zipfel, [cyril.zipfel@botinst.uzh.ch](mailto:cyril.zipfel@botinst.uzh.ch)

17

18

19 **Abstract**

20 Plant genomes encode hundreds of secreted peptides; however, relatively few have been

21 characterised. We report here an uncharacterised, stress-induced family of plant signalling

22 peptides, which we call CTNIPs. Based on the role of the common co-receptor

23 BRASSINOSTEROID INSENSITIVE 1-ASSOCIATED KINASE 1 (BAK1) in CTNIP-induced responses,

24 we identified the orphan receptor kinase HAESA-LIKE 3 (HSL3) as the CTNIP receptor via a

25 proteomics approach. CTNIP binding, ligand-triggered complex formation with BAK1, and  
26 induced downstream responses all involve HSL3. Notably, the HSL3-CTNIP signalling module  
27 is evolutionarily ancient, predating the divergence of extant angiosperms. The identification  
28 of this signalling module will help establish its physiological role and provides a resource to  
29 understand further receptor-ligand co-evolution.

30

### 31 **Introduction**

32 Secreted plant peptides play major roles in growth, development and stress responses  
33 (Olsson et al., 2019). Whilst many hundreds of peptides are predicted to be encoded in plant  
34 genomes, relatively few have been characterised and their corresponding receptors are  
35 mostly unknown (Olsson et al., 2019).

36 Most signalling peptides are recognised by cell-surface localised receptors, especially by  
37 leucine-rich repeat receptor kinases (LRR-RKs). LRR-RKs generally function through the ligand-  
38 dependent recruitment of a shape complementary co-receptor to form an active signalling  
39 complex (Hohmann et al., 2017). The best characterised peptide receptors belong to LRR-RK  
40 subfamily XI, which recognize distinct families of plant peptides involved in growth,  
41 development or stress responses (Furumizu et al., 2021). Notably, the LRR-RK MIK2, which  
42 belongs to the closely related LRR-RK subfamily XIIb (an outgroup recently included within  
43 subfamily XI; (Liu et al., 2017; Man et al., 2020)) was recently shown to perceive SCOOP  
44 peptides (Hou et al., 2021; Rhodes et al., 2021). Despite intensive studies on the LRR-RK  
45 subfamily XI, the ligand for HAESA-like 3 (HSL3) has remained elusive, hindering our ability to  
46 investigate peptide-receptor coevolution across the family (Furumizu et al., 2021; Lee et al.,  
47 2020).

48

## 49 **Results and discussion**

50 Several peptides (PEPs, PIPs, SCOOPs, CLEs and IDLs) recognised by LRR-RKs from subfamily  
51 XI or XIIb are transcriptionally up-regulated by abiotic or biotic stresses (Bartels et al., 2013;  
52 Gully et al., 2019; Kim et al., 2021; Takahashi et al., 2018; Vie et al., 2015). In order to identify  
53 novel stress-induced signalling peptides, we searched for *Arabidopsis thaliana* (hereafter,  
54 *Arabidopsis*) transcripts encoding short proteins (<150 amino acids) with a predicted signal  
55 peptide, which were induced upon biotic elicitor treatment (Bjornson et al., 2021). Through  
56 this analysis, we identified an uncharacterised family of peptides with 5 predicted members,  
57 which we named CTNIP1 to 5 (pronounced catnip) based on relatively conserved residues  
58 within the peptides (Figure 1a-b; Figure 1-figure supplement 1a-b).

59 To determine whether CTNIPs function as signalling peptides, we synthesized peptides  
60 corresponding to the whole CTNIP proteins excluding the predicted signal peptide. CTNIP1-4  
61 peptides were able to induce cytoplasmic Ca<sup>2+</sup> influx and mitogen-activated protein kinase  
62 (MAPK) phosphorylation – hallmarks of peptide signalling (Figure 1c-e). However, a synthetic  
63 peptide derived from the divergent CTNIP5 peptide was inactive (Figure1-figure supplement  
64 1a and 2c). Notably, the C-terminal 23 amino acids of CTNIP4, CTNIP4<sup>48-70</sup>, were sufficient to  
65 induce responses (Figure1-figure supplement 2a-b), suggesting that the minimal bioactive  
66 peptide is contained within this region. Notably, this region contains two highly conserved  
67 cysteine residues (Fig 1b). Mutation of these cysteine residues revealed they are required for  
68 CTNIP4 activity (Figure1-figure supplement 2c). Going forward, we focused on CTNIP4 as a  
69 representative member of this peptide family, as its transcript was the most up-regulated  
70 upon elicitor treatment (Figure 1a).

71

72 We hypothesised that CTNIPs may be perceived by a cell-surface LRR-receptor. Typically LRR-  
73 receptors are dependent upon the SOMATIC EMBRYOGENESIS RECEPTOR KINASE (SERK)  
74 family of co-receptors (Hohmann et al., 2017). We therefore tested whether CTNIP-induced  
75 responses were affected in *bak1-5*, an allele of *BRASSINOSTEROID INSENSITIVE 1-ASSOCIATED*  
76 *KINASE 1 (BAK1/SERK3)* that has a dominant-negative impact on SERK signalling (Perraki et  
77 al., 2018; Schwessinger et al., 2011). Concordant with perception by an LRR-receptor, we  
78 observed significantly impaired CTNIP4-induced reactive oxygen species production in *bak1-*  
79 *5* (Figure 1f-g).

80 Ligand-binding induces receptor-SERK heterodimerisation to activate signalling (Hohmann et  
81 al., 2017). To identify the CTNIP receptor, we therefore employed Arabidopsis lines expressing  
82 BAK1 tagged with green fluorescent protein (GFP) as a molecular bait to identify the CTNIP  
83 receptor. Using affinity-purification followed by mass spectrometry we looked for proteins  
84 specifically enriched into the BAK1 complex upon CTNIP4 treatment (Figure 2a) (Saur et al.,  
85 2016). In four independent biological replicates, the protein most enriched in the BAK1  
86 complex upon CTNIP4 treatment was the LRR-RK HAESA-LIKE 3 (HSL3) (Figure 2b; Figure2-  
87 figure supplement 1; Supplementary file 1), making this a promising candidate for being the  
88 CTNIP receptor. We could independently confirm CTNIP-induced HSL3-BAK1 complex  
89 formation by co-immunoprecipitation (Figure 2c).

90 Consistent with a receptor function, the HSL3 ectodomain (HSL3<sup>ECD</sup>, residues 22-627)  
91 heterologously-expressed in insect cells could directly bind CTNIP4 with a dissociation  
92 constant of  $\sim 4 \mu\text{M}$  in *in vitro* binding assays using isothermal titration calorimetry (Figure 2d-  
93 e; Figure2-figure supplement 2a-b). In the presence of CTNIP4, BAK1 strongly bound HSL3  
94 with a dissociation constant in the mid-nanomolar range ( $\sim 392 \text{ nM}$ ) (Figure 2d-f; Figure2-  
95 figure supplement 2b), consistent with its role as co-receptor. Furthermore, the two

96 conserved cysteine residues are required for receptor binding and co-receptor recruitment  
97 explaining their loss of signalling activity (Figure 2d, g-h; Figure1-figure supplement 2c;  
98 Figure2-figure supplement 2b).

99 Notably, we were unable to detect binding of INFLORESCENCE DEFICIENT IN ABSCISSION  
100 (IDA), the ligand for the related receptors HAESA and HAESA-LIKE 2 (HSL2) (Meng et al., 2016;  
101 Santiago et al., 2016), to HSL3<sup>ECD</sup> (Figure 2d; Figure2-figure supplement 2b), demonstrating  
102 distinct ligand specificity. Accordingly, structural analysis of a HSL3<sup>ECD</sup> homology model  
103 reveals that the HSL3 receptor lacks key conserved motifs required to recognise IDA peptides  
104 (Figure2-figure supplement 3) (Santiago et al., 2016). Together, our data show that, while  
105 HSL3 is phylogenetically related to HAE, HSL1 and HSL2, it perceives distinct peptides (*i.e.*  
106 CTNIPs) most likely via different binding interfaces, which remain to be investigated in future  
107 structural studies.

108 Having established biochemically that HSL3 is the CTNIP receptor, we tested its genetic  
109 requirement for CNTIP-induced responses. As expected, we found that HSL3 is strictly  
110 required for CTNIP-induced MAPK phosphorylation and whole genome transcriptional  
111 reprogramming (Figure 3a-b; Figure3-figure supplement 1). Notably, whilst 30 min treatment  
112 with 100 nM CTNIP4 led to differential expression of 1074 genes in wild-type Col-0, none were  
113 differentially expressed in *hsl3-1* ( $p < 0.05$ ,  $|\text{Log}_2(\text{FC})| > 1$ ) (Fig 3b; Supplementary file 2).

114 We could additionally show that transient expression of HSL3 in *Nicotiana benthamiana* is  
115 sufficient to confer responsiveness to CTNIPs (Figure 3c). Furthermore, whilst 500 nM CTNIP4  
116 was unable to significantly inhibit growth in Col-0 seedlings, plants that over-express *HSL3*  
117 became hypersensitive to active CTNIP4 (Figure 3 d-e; Figure3-figure supplement 2). Taken  
118 together, our biochemical and genetic results demonstrate that HSL3 is the CTNIP receptor.

119

120 CTNIPs induce general early signalling outputs indicative of RK signalling, including  
121 cytoplasmic Ca<sup>2+</sup> influx, MAPK phosphorylation and ROS production (Figure 1) (Olsson et al.,  
122 2019). In addition, CTNIP4 treatment induces significant HSL3-dependent transcriptional  
123 reprogramming (Figure 3b). Consistent with the up-regulation of *CTNIP* and *HSL3* expression  
124 by biotic elicitors (Figure 1a; Figure2-figure supplement 1), gene ontology analysis highlighted  
125 the enrichment of many defence- and stress-responsive pathways upon CTNIP4 treatment  
126 (Supplementary file 3). This is a pattern shared with other biotic elicitors (Figure3-figure  
127 supplement 3) indicative of a general stress response (Bjornson et al., 2021).

128 To investigate the biological consequence of HSL3 signalling, we fused the extracellular and  
129 transmembrane domains of BAK1-INTERACTING RECEPTOR-LIKE KINASE 3 (BIR3) to the  
130 cytoplasmic domain of HSL3 under the control of the *HSL3* promoter (Figure3-figure  
131 supplement 4a). This chimeric approach allows constitutive complex formation with SERKs,  
132 thus mimicking constitutive activation of an endogenous receptor kinase (Hohmann et al.,  
133 2020). Transgenic lines expressing this chimeric construct exhibited developmental defects,  
134 notably enhanced root curling (Figure 3f). Similarly, CTNIP4 treatment inhibited root growth  
135 and induced root skewing in a HSL3-dependent manner (Figure 3 g-i; Figure3-figure  
136 supplement 4c). In addition, *CTNIP4* overexpression, either with or without a C-terminal tag,  
137 was sufficient to induce a similar phenotype (Figure 3j-k; Figure3-figure supplement 4c).  
138 These data suggest that the HSL3-CTNIP signalling module modulates root development,  
139 similar to other LRR-RK subfamily XI signalling modules (Jeon et al., 2021; Jourquin et al.,  
140 2020).

141

142 Recent phylogenetic analyses indicate that HSL3 is conserved in angiosperms (Figure 4a;  
143 (Furumizu et al., 2021; Man et al., 2020). Having defined HSL3 as the CTNIP receptor, we

144 wondered whether CTNIPs were equally conserved. CTNIPs were identified in *Amborella*,  
145 eudicots and early divergent monocots (Figure 4b-d).

146 Given the conservation of the HSL3-CTNIP signalling module, the lack of *AtCTNIP4* responses  
147 in *N. benthamiana* suggests a co-evolution of ligand-receptor specificity, as for example  
148 previously proposed for PLANT ELICITOR PEPTIDE (PEP)-PEP RECEPTOR (PEPR) pairs (Huffaker,  
149 2015; Lori et al., 2015). Accordingly, *Medicago truncatula* HSL3 (*MtHSL3*) only induced a  
150 cytoplasmic calcium influx upon treatment with a conspecific CTNIP (*MtCTNIP*,  
151 *Medtr1g044470*) (Figure 4e).

152 Our phylogenetic analysis however surprisingly revealed that no clear CTNIP could be found  
153 in *Poaceae* genomes (Figure 4b-d). Interestingly, this absence is correlated with an expansion  
154 of HSL3 paralogs within these genomes (Figure 4b). We can speculate that the HSL3-CTNIP  
155 signalling module may have diverged considerably in this lineage. This is supported by the  
156 divergence between eudicot and monocot CTNIPs (Figure 4c). Interestingly, over 40 % of the  
157 CTNIPs identified were unannotated, including all monocot CTNIPs (Figure 4b), highlighting  
158 how genome annotation still represents a significant challenge in the characterisation of  
159 signalling peptides.

160

## 161 **Conclusion**

162 Here, we identified CTNIPs as a novel family of stress-induced signalling peptide. Using  
163 affinity-purification and mass spectrometry based on ligand-induced association with the  
164 BAK1 co-receptor, we identified the LRR-RK HSL3 as the CTNIP receptor. CTNIPs directly bind  
165 the HSL3 ectodomain to promote BAK1 recruitment, and HSL3 is necessary and sufficient to  
166 confer CTNIP perception. This ancient signalling module has been conserved for more than  
167 180 million years (Furumizu et al., 2021; Kumar et al., 2017); however, its physiological role

168 remains elusive. HSL3 has recently been shown to play a role in regulating drought and  
169 disease resistance implicating HSL3 in multiple stress responses (Lee et al., 2020).  
170 Deorphanising HSL3 makes LRR-RK subfamily XI an exciting tool to understand receptor-ligand  
171 co-evolution and recognition specificity.

172

### 173 **Acknowledgements**

174 We thank the John Innes Centre Horticultural Services for plant care, especially T. Wells; M.  
175 Smoker, J. Taylor and A. Wawryk from the TSL Plant Transformation support group for plant  
176 transformation and all past and current members of the Zipfel and Santiago groups for  
177 technical help and fruitful discussions. N. Talbot is acknowledged for hosting J.R. for part of  
178 this study. This work was supported by the European Research Council under the Grant  
179 Agreements no. 773153 and no. 716358 (grant “IMMUNO-PEPTALK” to C.Z. and grant  
180 “WallWatchers” to J.S., respectively), The Gatsby Charitable Foundation (to C.Z.), the  
181 University of Zürich (to C.Z.), the Swiss National Science Foundation grants no.  
182 31003A\_182625 (to C.Z.) and no. 31003A\_173101 (to J.S.), and the Fondation Philanthropique  
183 Famille Sandoz (to J.S.). M.B. was partially supported by the European Union’s Horizon 2020  
184 Research and Innovation Program under Marie Skłodowska-Curie Actions (grant agreement  
185 no. 703954).

186

187

### 188 **References**

189 Alexa A, Rahnenfuhrer J. 2021. topGO: Enrichment Analysis for Gene Ontology.  
190 Andrews S, Krueger F, Seifert-Pichon A, Biggins F, Wingett S. 2015. FastQC.: A quality  
191 control tool for high throughput sequence data. *Babraham Inst.*



- 192 <https://www.bioinformatics.babraham.ac.uk/projects/fastqc/><http://www.bioinfor>  
193 [matics.bbsrc.ac.uk/projects/fastqc/](https://www.bioinformatics.bbsrc.ac.uk/projects/fastqc/)
- 194 Bartels S, Lori M, Mbengue M, van Verk M, Klauser D, Hander T, Boni R, Robatzek S, Boller T.  
195 2013. The family of Peps and their precursors in Arabidopsis: differential expression  
196 and localization but similar induction of pattern-triggered immune responses. *J Exp Bot*  
197 **64**:5309–5321. doi:10.1093/jxb/ert330
- 198 Bjornson M, Pimprikar P, Nürnberger T, Zipfel C. 2021. The transcriptional landscape of  
199 Arabidopsis thaliana pattern-triggered immunity. *Nat Plants* 2021 **7**:579–586.  
200 doi:10.1038/s41477-021-00874-5
- 201 Blondel VD, Guillaume J-L, Lambiotte R, Lefebvre E. 2008. Fast unfolding of communities in  
202 large networks. *J Stat Mech Theory Exp* **2008**:P10008. doi:10.1088/1742-  
203 5468/2008/10/P10008
- 204 Bolger AM, Lohse M, Usadel B. 2014. Trimmomatic: A flexible trimmer for Illumina sequence  
205 data. *Bioinformatics* **30**:2114–2120. doi:10.1093/bioinformatics/btu170
- 206 Buchfink B, Xie C, Huson DH. 2014. Fast and sensitive protein alignment using DIAMOND.  
207 *Nat Methods* 2014 **12**:59–60. doi:10.1038/nmeth.3176
- 208 Butenko MA, Patterson SE, Grini PE, Stenvik G-E, Amundsen SS, Mandal A, Aalen RB. 2003.  
209 Inflorescence deficient in abscission controls floral organ abscission in Arabidopsis and  
210 identifies a novel family of putative ligands in plants. *Plant Cell* **15**:2296–307.  
211 doi:10.1105/tpc.014365
- 212 Castel B, Tomlinson L, Locci F, Yang Y, Jones JDG. 2019. Optimization of T-DNA architecture  
213 for Cas9-mediated mutagenesis in Arabidopsis. *PLoS One* **14**:e0204778.  
214 doi:10.1371/JOURNAL.PONE.0204778
- 215 Cho SK, Larue CT, Chevalier D, Wang H, Jinn T-L, Zhang S, Walker JC. 2008. Regulation of

- 216 floral organ abscission in *Arabidopsis thaliana*. *Proc Natl Acad Sci U S A* **105**:15629–34.  
217 doi:10.1073/pnas.0805539105
- 218 Crook AD, Willoughby AC, Hazak O, Okuda S, VanDerMolen KR, Soyars CL, Cattaneo P, Clark  
219 NM, Sozzani R, Hothorn M, Hardtke CS, Nimchuk ZL. 2020. BAM1/2 receptor kinase  
220 signaling drives CLE peptide-mediated formative cell divisions in *Arabidopsis* roots. *Proc*  
221 *Natl Acad Sci* **117**:32750–32756. doi:10.1073/PNAS.2018565117
- 222 Crooks GE, Hon G, Chandonia JM, Brenner SE. 2004. WebLogo: A sequence logo generator.  
223 *Genome Res* **14**:1188–1190. doi:10.1101/gr.849004
- 224 Csardi G, Nepusz T. 2006. The igraph software package for complex network research.  
225 *InterJournal Complex Syst* **Complex Sy**:1695.
- 226 Cutler SR, Ehrhardt DW, Griffiths JS, Somerville CR. 2000. Random GFP::cDNA fusions enable  
227 visualization of subcellular structures in cells of *Arabidopsis* at a high frequency. *Proc*  
228 *Natl Acad Sci U S A* **97**:3718–3723. doi:10.1073/pnas.97.7.3718
- 229 Doblus VG, Smakowska-Luzan E, Fujita S, Alassimone J, Barberon M, Madalinski M, Belkhadir  
230 Y, Geldner N. 2017. Root diffusion barrier control by a vasculature-derived peptide  
231 binding to the SGN3 receptor. *Science (80- )* **355**:280–284. doi:10.1126/science.aaj1562
- 232 Doll NM, Royek S, Fujita S, Okuda S, Chamot S, Stintzi A, Widiez T, Hothorn M, Schaller A,  
233 Geldner N, Ingram G. 2020. A two-way molecular dialogue between embryo and  
234 endosperm is required for seed development. *Science (80- )* **367**:431–435.  
235 doi:10.1126/science.aaz4131
- 236 Eddy SR. 2011. Accelerated Profile HMM Searches. *PLOS Comput Biol* **7**:e1002195.  
237 doi:10.1371/JOURNAL.PCBI.1002195
- 238 Edgar RC. 2004. MUSCLE: multiple sequence alignment with high accuracy and high  
239 throughput. *Nucleic Acids Res* **32**:1792–7. doi:10.1093/nar/gkh340

- 240 Emms DM, Kelly S. 2019. OrthoFinder: phylogenetic orthology inference for comparative  
241 genomics. *Genome Biol* 2019 201 **20**:1–14. doi:10.1186/S13059-019-1832-Y
- 242 Furumizu C, Krabberød AK, Hammerstad M, Alling RM, Wildhagen M, Sawa S, Aalen RB.  
243 2021. The sequenced genomes of nonflowering land plants reveal the innovative  
244 evolutionary history of peptide signaling. *Plant Cell*. doi:10.1093/PLCELL/KOAB173
- 245 Futatsumori-Sugai M, Tsumoto K. 2010. Signal peptide design for improving recombinant  
246 protein secretion in the baculovirus expression vector system. *Biochem Biophys Res*  
247 *Commun* **391**:931–935. doi:10.1016/j.bbrc.2009.11.167
- 248 Gu Z, Eils R, Schlesner M. 2016. Complex heatmaps reveal patterns and correlations in  
249 multidimensional genomic data. *Bioinformatics* **32**:2847–2849.  
250 doi:10.1093/bioinformatics/btw313
- 251 Gully K, Pelletier S, Guillou M-C, Ferrand M, Aligon S, Pokotylo I, Perrin A, Vergne E, Fagard  
252 M, Ruelland E, Grappin P, Bucher E, Renou J-P, Aubourg S. 2019. The SCOOP12 peptide  
253 regulates defense response and root elongation in *Arabidopsis thaliana*. *J Exp Bot*  
254 **70**:1349–1365. doi:10.1093/jxb/ery454
- 255 Harrell Jr FE. 2021. Hmisc: Harrell Miscellaneous.
- 256 Hashimoto Y, Zhang Sheng, Zhang Shiyong, Chen Y-R, Blissard GW. 2012. Erratum to: BTI-  
257 Tnao38, a new cell line derived from *Trichoplusia ni*, is permissive for AcMNPV  
258 infection and produces high levels of recombinant proteins. *BMC Biotechnol* 2012 121  
259 **12**:1–4. doi:10.1186/1472-6750-12-12
- 260 Hohmann U, Lau K, Hothorn M. 2017. The Structural Basis of Ligand Perception and Signal  
261 Activation by Receptor Kinases. *Annu Rev Plant Biol* **68**. doi:10.1146/annurev-arplant-  
262 042916-040957
- 263 Hohmann U, Ramakrishna P, Wang K, Lorenzo-Orts L, Nicolet J, Henschen A, Barberon M,

- 264 Bayer M, Hothorn M. 2020. Constitutive Activation of Leucine-Rich Repeat Receptor  
265 Kinase Signaling Pathways by BAK1-INTERACTING RECEPTOR-LIKE KINASE3 Chimera.  
266 *Plant Cell* **32**:3311–3323. doi:10.1105/tpc.20.00138
- 267 Hou S, Liu D, Huang S, Luo D, Liu Z, Xiang Q, Wang P, Mu R, Han Z, Chen S, Chai J, Shan L, He  
268 P. 2021. The Arabidopsis MIK2 receptor elicits immunity by sensing a conserved  
269 signature from phytocytokines and microbes. *Nat Commun* 2021 121 **12**:1–15.  
270 doi:10.1038/s41467-021-25580-w
- 271 Hou S, Wang X, Chen D, Yang X, Wang M, Turrà D, Di Pietro A, Zhang W. 2014. The secreted  
272 peptide PIP1 amplifies immunity through receptor-like kinase 7. *PLoS Pathog*  
273 **10**:e1004331. doi:10.1371/journal.ppat.1004331
- 274 Huffaker A. 2015. Plant elicitor peptides in induced defense against insects. *Curr Opin Insect*  
275 *Sci.* doi:10.1016/j.cois.2015.06.003
- 276 Jeon BW, Kim M-J, Pandey SK, Oh E, Seo PJ, Kim J. 2021. Recent advances in peptide  
277 signaling during Arabidopsis root development. *J Exp Bot* **72**:2889–2902.  
278 doi:10.1093/JXB/ERAB050
- 279 Jourquin J, Fukaki H, Beeckman T. 2020. Peptide-Receptor Signaling Controls Lateral Root  
280 Development. *Plant Physiol* **182**:1645–1656. doi:10.1104/PP.19.01317
- 281 Kim D, Perteza G, Trapnell C, Pimentel H, Kelley R, Salzberg SL. 2013. TopHat2: accurate  
282 alignment of transcriptomes in the presence of insertions, deletions and gene fusions.  
283 *Genome Biol* **14**:R36. doi:10.1186/gb-2013-14-4-r36
- 284 Kim JS, Jeon BW, Kim J. 2021. Signaling Peptides Regulating Abiotic Stress Responses in  
285 Plants. *Front Plant Sci* **12**:704490. doi:10.3389/FPLS.2021.704490
- 286 Knight MR, Campbell AK, Smith SM, Trewavas AJ. 1991. Transgenic plant aequorin reports  
287 the effects of touch and cold-shock and elicitors on cytoplasmic calcium. *Nature*

- 288           **352**:524–526. doi:10.1038/352524a0
- 289   Krol E, Mentzel T, Chinchilla D, Boller T, Felix G, Kemmerling B, Postel S, Arents M,  
290       Jeworutzki E, Al-Rasheid KAS, Becker D, Hedrich R. 2010. Perception of the *Arabidopsis*  
291       Danger Signal Peptide 1 Involves the Pattern Recognition Receptor At PEPR1 and Its  
292       Close Homologue At PEPR2. *J Biol Chem* **285**:13471–13479.  
293       doi:10.1074/jbc.M109.097394
- 294   Kumar S, Stecher G, Li M, Knyaz C, Tamura K. 2018. MEGA X: Molecular evolutionary  
295       genetics analysis across computing platforms. *Mol Biol Evol* **35**:1547–1549.  
296       doi:10.1093/molbev/msy096
- 297   Kumar S, Stecher G, Suleski M, Hedges SB. 2017. TimeTree: A Resource for Timelines,  
298       Timetrees, and Divergence Times. *Mol Biol Evol* **34**:1812–1819.  
299       doi:10.1093/molbev/msx116
- 300   Lee Y, Lemtiri-Chlieh F, Wang M, Zhang W, Liu X, Liang C, Hou S, Wang X, Chen D, Shen J.  
301       2020. The LRR-RLK Protein HSL3 Regulates Stomatal Closure and the Drought Stress  
302       Response by Modulating Hydrogen Peroxide Homeostasis.  
303       doi:10.3389/fpls.2020.548034
- 304   Lemoine F, Gascuel O. 2021. Gotree/Goalign: toolkit and Go API to facilitate the  
305       development of phylogenetic workflows. *NAR Genomics Bioinforma* **3**.  
306       doi:10.1093/NARGAB/LQAB075
- 307   Letunic I, Bork P. 2019. Interactive Tree Of Life (iTOL) v4: recent updates and new  
308       developments. *Nucleic Acids Res* **47**:W256–W259. doi:10.1093/nar/gkz239
- 309   Liao Y, Smyth GK, Shi W. 2019. The R package Rsubread is easier, faster, cheaper and better  
310       for alignment and quantification of RNA sequencing reads. *Nucleic Acids Res* **47**:e47–  
311       e47. doi:10.1093/NAR/GKZ114

- 312 Liu PL, Du L, Huang Y, Gao SM, Yu M. 2017. Origin and diversification of leucine-rich repeat  
313 receptor-like protein kinase (LRR-RLK) genes in plants. *BMC Evol Biol* **17**:1–16.  
314 doi:10.1186/s12862-017-0891-5
- 315 Lori M, Van Verk MC, Hander T, Schatowitz H, Klauser D, Flury P, Gehring CA, Boller T,  
316 Bartels S. 2015. Evolutionary divergence of the plant elicitor peptides (Peps) and their  
317 receptors: Interfamily incompatibility of perception but compatibility of downstream  
318 signalling. *J Exp Bot* **66**:5315–5325. doi:10.1093/jxb/erv236
- 319 Love MI, Huber W, Anders S. 2014. Moderated estimation of fold change and dispersion for  
320 RNA-seq data with DESeq2. *Genome Biol* **15**. doi:10.1186/s13059-014-0550-8
- 321 Man J, Gallagher JP, Bartlett M. 2020. Structural evolution drives diversification of the large  
322 LRR-RLK gene family. *New Phytol* nph.16455. doi:10.1111/nph.16455
- 323 Meng X, Zhou J, Tang J, Li B, de Oliveira MV V, Chai J, He P, Shan L. 2016. Ligand-Induced  
324 Receptor-like Kinase Complex Regulates Floral Organ Abscission in Arabidopsis. *Cell Rep*  
325 **14**:1330–1338. doi:10.1016/j.celrep.2016.01.023
- 326 Morita J, Kato K, Nakane T, Kondo Y, Fukuda H, Nishimasu H, Ishitani R, Nureki O. 2016.  
327 Crystal structure of the plant receptor-like kinase TDR in complex with the TDIF  
328 peptide. *Nat Commun* **7**:12383. doi:10.1038/ncomms12383
- 329 Mou S, Zhang X, Han Z, Wang J, Gong X, Chai J. 2017. CLE42 binding induces PXL2 interaction  
330 with SERK2. *Protein Cell* **8**:612–617. doi:10.1007/s13238-017-0435-1
- 331 Nakayama T, Shinohara H, Tanaka M, Baba K, Ogawa-Ohnishi M, Matsubayashi Y. 2017. A  
332 peptide hormone required for Casparian strip diffusion barrier formation in Arabidopsis  
333 roots. *Science (80- )* **355**.
- 334 Ntoukakis V, Schwessinger B, Segonzac C, Zipfel C. 2011. Cautionary notes on the use of C-  
335 terminal BAK1 fusion proteins for functional studies. *Plant Cell* **23**:3871–8.

- 336           doi:10.1105/tpc.111.090779
- 337   Ogawa M, Shinohara H, Sakagami Y, Matsubayash Y. 2008. Arabidopsis CLV3 peptide directly  
338           binds CLV1 ectodomain. *Science (80- )* **319**:294. doi:10.1126/science.1150083
- 339   Okuda S, Fujita S, Moretti A, Hohmann U, Doblaz VG, Ma Y, Pfister A, Brandt B, Geldner N,  
340           Hothorn M. 2020. Molecular mechanism for the recognition of sequencedivergent CIF  
341           peptides by the plant receptor kinases GSO1/SGN3 and GSO2. *Proc Natl Acad Sci U S A*  
342           **117**:2693–2703. doi:10.1073/pnas.1911553117
- 343   Olsson V, Joos L, Zhu S, Gevaert K, Butenko MA, De Smet I. 2019. Look Closely, the Beautiful  
344           May Be Small: Precursor-Derived Peptides in Plants. *Annu Rev Plant Biol* **70**:153–186.  
345           doi:10.1146/annurev-arplant-042817-040413
- 346   Ou Y, Lu X, Zi Q, Xun Q, Zhang J, Wu Y, Shi H, Wei Z, Zhao B, Zhang X, He K, Gou X, Li C, Li J.  
347           2016. RGF1 INSENSITIVE 1 to 5, a group of LRR receptor-like kinases, are essential for  
348           the perception of root meristem growth factor 1 in Arabidopsis thaliana. *Cell Res*  
349           **26**:686–698. doi:10.1038/cr.2016.63
- 350   Perez-Riverol Y, Csordas A, Bai J, Bernal-Llinares M, Hewapathirana S, Kundu DJ, Inuganti A,  
351           Griss J, Mayer G, Eisenacher M, Pérez E, Uszkoreit J, Pfeuffer J, Sachsenberg T, Yılmaz Ş,  
352           Tiwary S, Cox J, Audain E, Walzer M, Jarnuczak AF, Ternent T, Brazma A, Vizcaíno JA.  
353           2019. The PRIDE database and related tools and resources in 2019: improving support  
354           for quantification data. *Nucleic Acids Res* **47**:D442–D450. doi:10.1093/NAR/GKY1106
- 355   Perraki A, DeFalco TA, Derbyshire P, Avila J, Séré D, Sklenar J, Qi X, Stransfeld L,  
356           Schwessinger B, Kadota Y, Macho AP, Jiang S, Couto D, Torii KU, Menke FLH, Zipfel C.  
357           2018. Phosphocode-dependent functional dichotomy of a common co-receptor in plant  
358           signalling. *Nature*. doi:10.1038/s41586-018-0471-x
- 359   Price MN, Dehal PS, Arkin AP. 2010. FastTree 2 – Approximately Maximum-Likelihood Trees

- 360 for Large Alignments. *PLoS One* **5**:e9490. doi:10.1371/JOURNAL.PONE.0009490
- 361 Qian P, Song W, Yokoo T, Minobe A, Wang G, Ishida T, Sawa S, Chai J, Kakimoto T. 2018. The  
362 CLE9/10 secretory peptide regulates stomatal and vascular development through  
363 distinct receptors. *Nat Plants* **4**:1071–1081. doi:10.1038/s41477-018-0317-4
- 364 Rhodes J, Yang H, Moussu S, Boutrot F, Santiago J, Zipfel C. 2021. Perception of a divergent  
365 family of phytocytokines by the Arabidopsis receptor kinase MIK2. *Nat Commun*.  
366 doi:10.1038/s41467-021-20932-y
- 367 Rojo E, Sharma VK, Kovaleva V, Raikhel N V., Fletcher JC. 2002. CLV3 is localized to the  
368 extracellular space, where it activates the Arabidopsis CLAVATA stem cell signaling  
369 pathway. *Plant Cell* **14**:969–977. doi:10.1105/tpc.002196
- 370 Roux M, Schwessinger B, Albrecht C, Chinchilla D, Jones A, Holton N, Malinovsky FG, Tör M,  
371 de Vries S, Zipfel C. 2011. The Arabidopsis leucine-rich repeat receptor-like kinases  
372 BAK1/SERK3 and BKK1/SERK4 are required for innate immunity to hemibiotrophic and  
373 biotrophic pathogens. *Plant Cell* **23**:2440–2455. doi:10.1105/tpc.111.084301
- 374 Santiago J, Brandt B, Wildhagen M, Hohmann U, Hothorn LA, Butenko MA, Hothorn M.  
375 2016. Mechanistic insight into a peptide hormone signaling complex mediating floral  
376 organ abscission. *Elife* **5**. doi:10.7554/eLife.15075
- 377 Saur IML, Kadota Y, Sklenar J, Holton NJ, Smakowska E, Belkhadir Y, Zipfel C, Rathjen JP.  
378 2016. NbCSPR underlies age-dependent immune responses to bacterial cold shock  
379 protein in *Nicotiana benthamiana*. *Proc Natl Acad Sci U S A*.  
380 doi:10.1073/pnas.1511847113
- 381 Schwessinger B, Roux M, Kadota Y, Ntoukakis V, Sklenar J, Jones A, Zipfel C. 2011.  
382 Phosphorylation-Dependent Differential Regulation of Plant Growth, Cell Death, and  
383 Innate Immunity by the Regulatory Receptor-Like Kinase BAK1. *PLoS Genet* **7**:e1002046.



- 384       doi:10.1371/journal.pgen.1002046
- 385       Segonzac C, Feike D, Gimenez-Ibanez S, Hann DR, Zipfel C, Rathjen JP. 2011. Hierarchy and  
386       roles of pathogen-associated molecular pattern-induced responses in nicotiana  
387       benthamiana. *Plant Physiol* **156**:687–699. doi:10.1104/pp.110.171249
- 388       Shinohara H, Mori A, Yasue N, Sumida K, Matsubayashi Y. 2016. Identification of three LRR-  
389       RKs involved in perception of root meristem growth factor in Arabidopsis. *Proc Natl*  
390       *Acad Sci U S A* **113**:3897–3902. doi:10.1073/pnas.1522639113
- 391       Smakowska-Luzan E, Mott GA, Parys K, Stegmann M, Howton TC, Layeghifard M, Neuhold J,  
392       Lehner A, Kong J, Grünwald K, Weinberger N, Satbhai SB, Mayer D, Busch W,  
393       Madalinski M, Stolt-Bergner P, Provart NJ, Mukhtar MS, Zipfel C, Desveaux D, Guttman  
394       DS, Belkhadir Y. 2018. An extracellular network of Arabidopsis leucine-rich repeat  
395       receptor kinases. *Nature* **553**:342–346. doi:10.1038/nature25184
- 396       Song W, Liu L, Wang J, Wu Z, Zhang H, Tang J, Lin G, Wang Y, Wen X, Li W, Han Z, Guo H,  
397       Chai J. 2016. Signature motif-guided identification of receptors for peptide hormones  
398       essential for root meristem growth. *Cell Res* **26**:674–85. doi:10.1038/cr.2016.62
- 399       Stanke M, Diekhans M, Baertsch R, Haussler D. 2008. Using native and syntenically mapped  
400       cDNA alignments to improve de novo gene finding. *Bioinformatics* **24**:637–644.  
401       doi:10.1093/BIOINFORMATICS/BTN013
- 402       Stephens M. 2017. False discovery rates: A new deal. *Biostatistics* **18**:275–294.  
403       doi:10.1093/biostatistics/kxw041
- 404       Tabata R, Sumida K, Yoshii T, Ohyama K, Shinohara H, Matsubayashi Y. 2014. Perception of  
405       root-derived peptides by shoot LRR-RKs mediates systemic N-demand signaling. *Science*  
406       (80- ) **346**:343–346. doi:10.1126/science.1257800
- 407       Takahashi F, Suzuki T, Osakabe Y, Betsuyaku S, Kondo Y, Dohmae N, Fukuda H, Yamaguchi-

- 408 Shinozaki K, Shinozaki K. 2018. A small peptide modulates stomatal control via abscisic  
409 acid in long-distance signalling. *Nature* **556**:1. doi:10.1038/s41586-018-0009-2
- 410 Van der Does D, Boutrot F, Engelsdorf T, Rhodes J, McKenna JF, Vernhettes S, Koevoets I,  
411 Tintor N, Veerabagu M, Miedes E, Segonzac C, Roux M, Breda AS, Hardtke CS, Molina A,  
412 Rep M, Testerink C, Mouille G, Höfte H, Hamann T, Zipfel C. 2017. The Arabidopsis  
413 leucine-rich repeat receptor kinase MIK2/LRR-KISS connects cell wall integrity sensing,  
414 root growth and response to abiotic and biotic stresses. *PLOS Genet* **13**:e1006832.  
415 doi:10.1371/journal.pgen.1006832
- 416 Vie AK, Najafi J, Liu B, Winge P, Butenko MA, Hornslien KS, Kumpf R, Aalen RB, Bones AM,  
417 Brembu T. 2015. The IDA/IDA-LIKE and PIP/PIP-LIKE gene families in Arabidopsis:  
418 phylogenetic relationship, expression patterns, and transcriptional effect of the PIPL3  
419 peptide. *J Exp Bot* **66**:5351–65. doi:10.1093/jxb/erv285
- 420 Wagih O. 2017. Ggseqlogo: A versatile R package for drawing sequence logos. *Bioinformatics*  
421 **33**:3645–3647. doi:10.1093/bioinformatics/btx469
- 422 Wei T, Simko V. 2021. R package “corrplot”: Visualization of a Correlation Matrix.
- 423 Wheeler TJ, Eddy SR. 2013. nhmmer: DNA homology search with profile HMMs.  
424 *Bioinformatics* **29**:2487–2489. doi:10.1093/BIOINFORMATICS/BTT403
- 425 Yamaguchi Y, Huffaker A, Bryan AC, Tax FE, Ryan CA. 2010. PEPR2 Is a Second Receptor for  
426 the Pep1 and Pep2 Peptides and Contributes to Defense Responses in *Arabidopsis*.  
427 *Plant Cell* **22**:508–522. doi:10.1105/tpc.109.068874
- 428 Yamaguchi Y, Pearce G, Ryan CA. 2006. The cell surface leucine-rich repeat receptor for  
429 AtPep1, an endogenous peptide elicitor in Arabidopsis, is functional in transgenic  
430 tobacco cells. *Proc Natl Acad Sci U S A* **103**:10104–9. doi:10.1073/pnas.0603729103
- 431 Zhang H, Lin X, Han Z, Qu L-J, Chai J. 2016. Crystal structure of PXY-TDIF complex reveals a

432 conserved recognition mechanism among CLE peptide-receptor pairs. *Cell Res* **26**:543–  
433 555. doi:10.1038/cr.2016.45

434

435

## 436 **Figure and Table Legends**

437

### 438 **Figure 1. CTNIPs are a novel family of plant signalling peptide**

439 (a) Heat map showing  $\log_2(\text{FC})$  expression levels of CTNIP1-4 in response to a range of  
440 elicitors (data obtained from Bjornson *et al.* (2021)).

441 (b) Sequence probability logo from *Arabidopsis* CTNIP1-4 generated using WebLogo3.

442 Signal peptide (as predicted by SignalP5.0) and CTNIP motif are indicated, and conserved

443 cysteine residues are highlighted in yellow. Amino acids are coloured based on their

444 biochemical properties: red = acidic; blue= basic; black = hydrophobic and green = polar.

445 (c-d) cytoplasmic calcium influx measured in *p35S::AEQUORIN* seedlings after treatment

446 with 1  $\mu\text{M}$  CTNIP relative to pre-treated levels ( $n = 8$  seedlings). (c) Points represent mean;

447 error bars represent S.E.M. (d) represents mean relative  $\text{Ca}^{2+}$  influx between 5 and 15 min.

448 A line represents mean; error bars represent S.D. *P*-values indicate significance relative to

449 the WT control in a Dunnett's multiple comparison test following one-way ANOVA.

450 (e) Western blot using  $\alpha\text{-p42/p44-ERK}$  recognizing phosphorylated MAP kinases in

451 seedlings treated with 100 nM CTNIPs or mock for 15 min. The membrane was stained

452 with CBB, as a loading control.

453 (f-g) ROS production in leaf disks collected from 4-week-old *Arabidopsis* plants induced by

454 1  $\mu\text{M}$  CTNIP4 application ( $n \geq 8$ ). (f) Points represent mean; error bars represent

455 S.E.M. (g) Integrated ROS production over 40 min. Line represents mean; error bars

456 represent S.D. *P*-values indicate significance relative to the WT control in a two-tailed T-  
457 test.

458 All experiments were repeated and analysed three times with similar results. ROS,  
459 reactive oxygen species; CBB, Coomassie brilliant blue.

460

461

462 **Figure 2. HSL3 forms a CTNIP-induced receptor complex with BAK1**

463 (a) Schematic representation of BAK1-GFP immunoprecipitation in the (1) absence or (2)  
464 presence of CTNIP4 treatment to identify protein associations induced by CTNIP. Figure  
465 generated using Biorender.

466 (b) HSL3-specific spectral counts identified in four independent biological replicates  
467 where BAK1-GFP was pulled-down in the presence or absence of 1  $\mu$ M CTNIP4 treatment.  
468 Circle diameter is proportional to the number of replicates. Red lines indicate the mean  
469 spectral counts for each treatment. *P*-values indicate significance relative to the untreated  
470 control in a two-tailed T-test.

471 (c) Co-immunoprecipitation of BAK1 with HSL3-GFP from HSL3-GFP seedlings treated  
472 with 1  $\mu$ M CTNIP4<sup>48-70</sup> or water for 10 min. Western blots were probed with antibodies  $\alpha$ -  
473 GFP and  $\alpha$ -BAK1. This experiment was repeated 3 three times with similar results.

474 (d) ITC summary table of HSL3 vs CTNP4<sup>48-70</sup>, CTNP4<sup>C58S/C68S</sup> and IDA peptides, and  
475 contribution of the BAK1 co-receptor to the ternary complex formation.  $K_d$ , (dissociation  
476 constant) indicates the binding affinity between the two molecules considered (nM). The  
477 N indicates the reaction stoichiometry (N=1 for a 1:1 interaction). The values indicated in  
478 the table are the mean  $\pm$  S.E.M. of two independent experiments.

479 (e) Isothermal titration calorimetry (ITC) experiments of HSL3 vs CTNIP4 and  
480 CTNIP4<sup>C58S/C68S</sup>, in the absence and presence of the co-receptor BAK1.

481

482 **Figure 3. HSL3 is strictly required for CTNIP perception and growth regulation**

483 (a) Western blot using  $\alpha$ -p42/p44-ERK recognizing phosphorylated MAP kinases in  
484 seedlings treated with 100 nM CTNIPs or mock for 15 min. The membrane was stained  
485 with CBB, as a loading control.

486 (b) Heat map showing all significantly differentially expressed genes ( $p < 0.05$ ,  
487  $|\text{Log}_2(\text{FC})| > 1$ ) in *Arabidopsis* WT or *hsl3-1* seedlings treated with or without 100 nM  
488 CTNIP4<sup>48-70</sup> for 30 min relative to a mock control.

489 (c) Mean relative cytoplasmic  $\text{Ca}^{2+}$  influx in leaf disks of *N. benthamiana* transiently  
490 expressing the defined constructs induced by 1  $\mu\text{M}$  CTNIP or mock application ( $n = 8$  leaf  
491 disks). A line represents mean; error bars represent S.D. *P*-values indicate significance  
492 relative to the GUS-transformed control in a Dunnett's multiple comparison test following  
493 one-way ANOVA.

494 (d) Fresh weight of 14-day-old seedlings grown in the presence of 500 nM CTNIP4 for 10  
495 days relative to mock ( $n = 8$  seedlings). A line represents mean; error bars represent S.D.  
496 *P*-values indicate significance relative to the WT control in a two-tailed T-test.

497 (e) Representative images of (d).

498 (f-g) Nine-day-old vertically grown *Arabidopsis* seedlings on 1/2 MS agar medium with 1  
499 % sucrose. Pictures were taken from the front of the plate.

500 (h-k) Root parameters were quantified from the base of the hypocotyl to the root tip using  
501 ImageJ (h) Root angle is shown relative to mock. Negative values indicate leftward root  
502 skewing. (j) Absolute root angle with 90° representing the gravity vector. Angles  $< 90^\circ$

503 represent skewing to the left. A line represents mean; error bars represent S.D. *P*-values  
504 indicate significance relative to the WT control in a Dunnett's multiple comparison test  
505 following one-way ANOVA. All experiments were repeated and analysed three times with  
506 similar results.

507

#### 508 **Figure 4. The HSL3-CTNIP signalling module is ancient and conserved**

509 (a) Phylogeny of the full-length amino acid sequences of HAE/HSL/CEPR/RLK7/IKU2 clade  
510 of receptor kinases. Eudicot sequences are indicated in blue, monocot sequences in green  
511 and *Amborella* sequences in red. Clades are named based upon the *Arabidopsis* genes.  
512 Alignment shown in Supplementary file 11. Further details of species, sequence  
513 identification, alignment and phylogeny generation are described in the material and  
514 methods.

515 (b) Species tree with number of CTNIP and HSL3 orthologs identified. Annotated CTNIPs  
516 are shown in grey whilst unannotated CTNIPs are shown in black. Sequences are shown  
517 in Supplementary file 9 and Supplementary file 11.

518 (c) Phylogeny of the full-length amino acid sequences of CTNIPs. Eudicot sequences are  
519 indicated in blue, monocot sequences in green and *Amborella* sequences in red.  
520 Sequences shown in Supplementary file 9. Further details of species, sequence  
521 identification, alignment and phylogeny generation are described in the material and  
522 methods.

523 (d) Sequence Logo generated from CTNIP alignment from (c) using the R-package  
524 ggseqlogo. Amino acids are coloured based on their biochemical properties: red = acidic;  
525 blue= basic; black = hydrophobic; purple = neutral and green = polar.

526 (e) Cytoplasmic calcium influx measured after treatment with 1  $\mu$ M CTNIP  
527 in *p35S::AEQUORIN N. benthamiana* leaf disks transiently expressing the defined  
528 construct, relative to pre-treatment ( $n = 8$  leaf disks). Points represent mean; error bars  
529 represent S.E.M. Experiments were repeated and analysed three times with similar  
530 results.

531

### 532 **Figure 1 – figure supplement 1. Alignment and phylogeny of *Arabidopsis* CTNIPs**

533 (a) Phylogeny of *Arabidopsis* CTNIPs. Full length protein sequences were aligned using  
534 MUSCLE and a phylogeny was inferred using the Maximum-likelihood method and JTT  
535 matrix-based model conducted in MEGAX. 1000 bootstraps were performed and values  
536 shown in blue. Branch lengths are shown in black.

537 (b) Alignment used to generate (a). CTNIP motif is highlighted in red.

538

### 539 **Figure 1 -figure supplement 2. Characterisation of CTNIP fragments**

540 (a) Alignment of CTNIP4 fragments used in this manuscript.

541 (b) Western blot using  $\alpha$ -p42/p44-ERK recognizing phosphorylated MAP kinases in  
542 seedlings treated with 100 nM CTNIP4 fragments or mock for 15 min. The membrane was  
543 stained with CBB, as a loading control.

544 (c) Mean relative  $\text{Ca}^{2+}$  influx induced by 1  $\mu$ M CTNIP in *p35S::AEQUORIN* seedlings  
545 between 5 and 15 min, relative to pre-treatment ( $n = 8$  seedlings). A line represents mean;  
546 error bars represent S.D. *P*-values indicate significance relative to the WT control in a  
547 Dunnett's multiple comparison test following one-way ANOVA.

548

### 549 **Figure 2 – figure supplement 1. *Arabidopsis* LRR-RK subfamily XI**

550 Phylogeny of full-length protein sequences of the *Arabidopsis* LRR-RK subfamily XI.  
551 Sequences were aligned using MUSCLE and a phylogeny was inferred using the Maximum-  
552 likelihood method and JTT matrix-based model conducted in MEGAX. 1000 bootstraps  
553 were performed and are indicated based on the size of the blue circles. Expression of  
554 these receptors in response to 1  $\mu$ M flg22 treatment was extracted from Bjornson *et al.*  
555 (2021) and is represented in a heat map. Known ligands for LRR-RK subfamily XI are  
556 highlighted to the right (Butenko *et al.*, 2003; Cho *et al.*, 2008; Crook *et al.*, 2020; Doblas  
557 *et al.*, 2017; Doll *et al.*, 2020; Hou *et al.*, 2014; Krol *et al.*, 2010; Morita *et al.*, 2016; Mou  
558 *et al.*, 2017; Nakayama *et al.*, 2017; Ogawa *et al.*, 2008; Okuda *et al.*, 2020; Ou *et al.*, 2016;  
559 Qian *et al.*, 2018; Rojo *et al.*, 2002; Santiago *et al.*, 2016; Shinohara *et al.*, 2016; Song *et al.*  
560 *et al.*, 2016; Tabata *et al.*, 2014; Yamaguchi *et al.*, 2010, 2006; Zhang *et al.*, 2016).

561

562 **Figure 2 – figure supplement 2. ITC independent experiments and purification of HSL3 and**  
563 **BAK1 used in the binding experiments.**

564 (a) Analytical size-exclusion chromatography (SEC) of the ectodomains of HSL3 and BAK1.  
565 An SDS PAGE of the two proteins is shown alongside.

566 (b) ITC raw thermograms of experiments shown in the ITC table summary in Figure 2d.

567

568 **Figure 2 – figure supplement 3. Structural comparison of the binding pockets between the**  
569 **receptors HAESA and HSL3**

570 (a) The hydroxyproline pocket required for anchoring the IDA peptide to the HAESA  
571 receptor is missing in HSL3. Close view of the binding pocket of the structural  
572 superimposition of the HAESA-IDA complex (PDB:5IXQ) and a homology model of HSL3  
573 (AlphaFold: <https://alphafold.ebi.ac.uk/>). The HAESA receptor is depicted in surface



574 representation in teal blue, IDA in yellow sticks and HSL3 in magenta cartoon. In HSL3, the  
575 hydroxyproline pocket is replaced by the bulky residue Phe286, colliding with the  
576 potential anchoring of the IDA peptide to the receptor.

577 **(b)** The conserved RxR motif necessary for the coordination of the COO<sup>-</sup> group the last Asn  
578 in IDA is not present in the HSL3 receptor. Zoom in of the C-terminal region of the peptide  
579 binding surface of HAESA (teal blue) (left panel) and HSL3 (magenta) (right panel). In  
580 HAESA the motif RxR closes the binding pocket allowing for the coordination of the C-  
581 terminal of IDA. In HSL3 this structural motif is substituted by the residues Thr406 and  
582 Gln408, leaving the binding surface open to potentially accommodate a longer peptide  
583 ligand. Figures were done using the PyMOL Molecular Graphics System, Version 2.0  
584 Schrödinger, LLC.

585

### 586 **Figure 3 – figure supplement 1. Genetic characterization of *hs13* mutants**

587 **(a)** Gene model showing the location of T-DNA inserts.

588 **(b)** PCR confirming T-DNA insertion and mutant homozygosity.

589

### 590 **Figure 3 – figure supplement 2. CTNIP-induced seedling growth inhibition**

591 **(a-b)** Fresh weight of 14-day-old seedlings grown in the presence of 500 nM CTNIPs for 10  
592 days relative to mock ( $n = 8$  seedlings). A line represents mean; error bars represent S.D.;  
593 *P*-values indicate significance relative to the WT control in a Dunnett's multiple  
594 comparison test following one-way ANOVA.

595

596 **Figure 3 – figure supplement 3. Correlation of CTNIP4-induced transcriptomic response with**  
597 **that of elicitors at 30 min**

598 CTINP4-induced gene expression is well correlated with elicitor-induced gene expression  
599 from Bjornson *et al.* (2021). Circle colour and size are proportional to the Spearman  
600 correlation coefficient (R-squared value) of each pairwise comparison of  $\log_2$ (fold  
601 changes).

602

603 **Figure 3 – figure 4. Characterisation of CTNIP and chimeric receptor lines**

604 (a) Western blot using  $\alpha$ -FLAG recognizing BIR3<sub>ecto</sub>-HSL3<sub>cyto</sub>-FLAG in seedlings to confirm  
605 expression. The membrane was stained with CBB, as a loading control.

606 (b) Documentation of the Cas9-induced mutations observed within the *ctnip1-4*  
607 polymutant and their predicted effects on protein products.

608 (c) qRT-PCR documenting the overexpression of CTNIP lines. Expression of *CTNIP4* is  
609 shown relative to *U-Box (At5g15400)*. Points represent independent biological replicates  
610 each comprising two technical replicates. Lines represent the mean of biological  
611 replicates.

612

613 **Supplementary file 1. Spectral counts of peptides identified through affinity-purification of**  
614 **the BAK1 complex**

615

616 **Supplementary file 2. Differential gene expression induced by 30 min CTNIP4<sup>48-70</sup> treatment**

617

618 **Supplementary file 3. Gene ontology enrichment following 30 min CTNIP4<sup>48-70</sup> treatment**

619 **Supplementary file 4. Primers**

620

621 **Supplementary file 5. Synthetic peptides**

622

623 **Supplementary file 6. Species induced in CTNIP and RK search**

624

625 **Supplementary file 7. Initial CTNIP candidates used to search**

626

627 **Supplementary file 8. Identified CTNIPs relaxed**

628

629 **Supplementary file 9. Identified CTNIPs confident**

630

631 **Supplementary file 10. Initial RK candidates used to search**

632

633 **Supplementary file 11. Alignment of RKs identified**

634

635

636 **Material and Methods**

637

638 ***Plant material and growth conditions***

639 Arabidopsis plants for ROS burst assays were grown in individual pots at 21 °C with a 10-h

640 photoperiod. Seeds grown on plates were surface sterilized using chlorine gas for 5–6 h and

641 sown on 1/2 Murashige and Skoog (MS) media, 1 % sucrose, and 0.8 % agar and stratified at

642 4 °C for 2–3 days. Plates were then transferred to 22 °C under a 16-h photoperiod. For root

643 growth assays plates were placed in an upright position under a 10° angle relative to the

644 direction of gravity and images were taken 9 days later (Van der Does et al., 2017). *Nicotiana*

645 *benthamiana* plants were grown on peat-based media at 24 °C, with 16-h photoperiod.

646 Aequorin lines of *Arabidopsis* and *N. benthamiana* were described previously (Knight et al.,  
647 1991; Segonzac et al., 2011). *hsl3* mutants have been previously described and were obtained  
648 from the Eurasian Arabidopsis Stock Centre (uNASc) (Hou et al., 2014; Lee et al., 2020). *bak1-*  
649 *4/pBAK1::BAK1-GFP*, *bak1-5* and *p35S::GFP-Lti6B* lines have also been described previously  
650 (Cutler et al., 2000; Ntoukakis et al., 2011; Schwessinger et al., 2011).

651

### 652 ***Synthetic peptides***

653 All synthetic peptides were ordered at >80 % purity from either EZbiolabs or Genscript.  
654 Sequences of all peptides can be found in Supplementary file 5.

655

### 656 ***Alignment and phylogeny of Arabidopsis CTNIPs and LRR-RK subfamily XI***

657 Full length protein sequences were aligned using MUSCLE (Edgar, 2004) and a phylogeny was  
658 inferred using the Maximum-likelihood method and JTT matrix-based model conducted in  
659 MEGAX (Kumar et al., 2018). 1000 bootstraps were performed. Trees were visualised in iTOL  
660 (Letunic and Bork, 2019). The sequence logo was generated using WebLogo3 (Crooks et al.,  
661 2004).

662

### 663 ***Molecular cloning***

#### 664 ***In-planta expression***

665 For overexpression of *AtHSL3-GFP* and *MtHSL3* in *N. benthamiana* and *Arabidopsis* the  
666 genomic DNA sequence was amplified from *Arabidopsis* ecotype Columbia and *M. truncatula*  
667 ecotype A11, domesticated and directly ligated into pICSL86977 downstream of a 35S  
668 promoter and with an in-frame C-terminal GFP tag.

669 Fragments for the pHSL3::BIR3ecto-HSL3cyto-FLAG construct were amplified from genomic  
670 DNA using the indicated primers and ligated into pICSL86955 (Supplementary file 4).  
671 Fragments were designed according to Hohmann *et al.* (2020). Clones were verified by Sanger  
672 sequencing.

673

#### 674 ***CRISPR-Cas9 mutagenesis***

675 CRISPR-Cas9 induced mutagenesis was performed as described by Castel *et al.* (2019). The  
676 *RPS5a* promoter drove Cas9 expression and FASTred selection was used for positive and  
677 negative selection. Primers used to generate the vector can be found in Supplementary file 4.  
678 Mutants were screened by Sanger sequencing.

679

#### 680 ***ROS measurements***

681 Leaf disks were harvested from 4-week-old *Arabidopsis* plants into white 96-well-plates  
682 (655075, Greiner Bio-One) containing 100  $\mu$ L water using a 4-mm diameter biopsy punch  
683 (Integra™ Miltex™). Leaf disks were rested overnight. Prior to ROS measurement, the water  
684 was removed and replaced with ROS assay solution (100  $\mu$ M Luminol (123072, Merck),  
685 20  $\mu$ g mL<sup>-1</sup> horseradish peroxidase (P6782, Merck)) with or without elicitors. Immediately  
686 after light emission was measured from the plate using a HIGH-RESOLUTION PHOTON  
687 COUNTING SYSTEM (HRPCS218, Photek) equipped with a 20 mm F1.8 EX DG ASPHERICAL RF  
688 WIDE LENS (Sigma Corp).

689

#### 690 ***Cytoplasmic calcium measurements***

691 Seedlings were initially grown on 1/2 MS plates for 3 days before being transferred to 96-well  
692 plates (655075, Greiner Bio-One) in 100  $\mu$ L liquid MS for 5 days. The evening before calcium

693 measurements the liquid MS was replaced with 100  $\mu$ L 20  $\mu$ M coelenterazine (EC14031,  
694 Carbosynth) and the seedlings incubated in the dark overnight. The following morning the  
695 coelenterazine solution was replaced with 100  $\mu$ L water and rested for a minimum of 30 min  
696 in the dark. Readings were taken in a VARIOSKAN™ MUTIPLATE READER (ThermoFisher)  
697 before and after adding 50  $\mu$ L of 3 $\times$  concentrated elicitor solution or mock. For each well  
698 readings were normalised to the average RLU value before elicitor addition ( $L_0$ ).

699

#### 700 ***Seedling growth inhibition***

701 Four-day-old seedlings growing on 1/2 MS plates were transferred into individual wells of a  
702 transparent 48-well tissue culture plate (Greiner Bio-One) containing 500  $\mu$ L of liquid MS  
703 media with/without elicitor addition. The plates were returned to the growth conditions for  
704 an additional 10 days before seedlings were blot-dried and weighed.

705

#### 706 ***Protein extraction and western blot***

707 Two-week-old seedlings grown in liquid MS media (MAPK phosphorylation) or leaf disks from  
708 4-week-old plants were flash-frozen in liquid nitrogen. Frozen plant tissue was ground in a  
709 Genogrinder® with 2mm glass beads (1500 strokes/min, 1.5 min) prior to boiling in 2 $\times$   
710 Laemmli sample buffer (4 % SDS, 20 % glycerol, 10 % 2-mercaptoethanol, 0.004 %  
711 bromophenol blue, and 0.125 M Tris-HCl; (10  $\mu$ L.mg<sup>-1</sup> tissue)) for 10 min at 95 °C. The samples  
712 were then spun at 13,000 rcf for 5 min prior to loading and running on SDS-PAGE gels.  
713 Proteins were transferred using semi-dry transfer onto PVDF membrane (ThermoFisher),  
714 blocked in 5 % (w/v) Bovine serum albumin prior to incubation with appropriate antibodies  
715 ( $\alpha$ -pMAPK ((p44/42 MAPK (Erk1/2) antibody #9102; 1:4000);  $\alpha$ -FLAG-HRP (A8592, Merck;  
716 1:5,000) and  $\alpha$ -rabbit-HRP (A-0545, Merck; 1:10000). Western blots were imaged with a LAS

717 4000 IMAGEQUANT SYSTEM (GE Healthcare) or on X-ray film before being developed.

718 Staining of the blotted membrane with Coomassie brilliant blue was used to confirm loading.

719

### 720 ***Co-immunoprecipitation***

721 All steps involving the protein extract and subsequent protein isolation were carried out on

722 ice or at 4 °C and all buffers and tubes were pre-cooled.

723 Seeds were sown on 1/2 MS agar and stratified for 3 days as described above. When seedlings

724 had germinated, they were transferred 6 seedlings per well into 6 well plates containing 5 mL

725 of liquid MS media and grown for a further 12 days. Seedlings were then transferred into MS

726 media either with or without CTNIP4 addition and vacuum infiltrated for 2 min and left in the

727 solution for a further 10 min. Seedlings were rapidly dried and flash frozen in liquid nitrogen

728 and ground. Proteins were extracted using by addition of ~2:1 extraction buffer (50 mM Tris

729 pH 7.5, 150 mM NaCl, 2.5 mM EDTA, 10 % Glycerol, 1 % IGEPAL, 5 mM DTT, 1 % plant protease

730 inhibitor cocktail (P9599, Sigma)):ground tissue (v/v). Proteins were solubilised at 4 °C with

731 gentle agitation for 30 min before filtering through miracloth. The filtrate was centrifuged at

732 30000 rcf for 30 min at 4 °C. Protein concentrations were normalised using Bradford assay.

733 An input sample was taken. To each 15 ml of protein extract 40 µl of GFP-TRAP AGAROSE

734 BEADS (50 % slurry, ChromoTek) washed in extraction buffer were added and incubated with

735 gentle agitation for 4 h at 4 °C. Bead were harvested by centrifugation at 1500 x g for 2 min

736 and washed 3 times in extraction buffer. Beads were then resuspended in fifty microliters of

737 1.5 x elution (NuPage) buffer and incubated at 80 °C for 8 min. Samples were subsequently

738 used from MS analysis or Western blotting.

739 Western blotting was performed as described previously ( $\alpha$ -BAK1 (Roux et al., 2011);  
740 1:2000),  $\alpha$ -GFP-HRP (sc-9996, Santa Cruz; 1:5000) and  $\alpha$ -rabbit-HRP (A-0545, Merck;  
741 1:10000).

742

### 743 ***Sample Preparation for Mass Spectrometry***

744 Co-immunoprecipitated protein samples were ran approximately 1 cm into an SDS-PAGE  
745 gel. This portion of the gel was then excised, cut into smaller pieces and washed three times  
746 with acetonitrile (LC-MS-Grade):ammonium bicarbonate (50 mM), pH 8.0 (1:1, v/v), 30 min  
747 each, followed by dehydration in acetonitrile, 10 min. Gel pieces were then reduced with 10  
748 mM DTT for 30 min at 45 °C followed by alkylation with 55 mM iodoacetamide for 20 min at  
749 room temperature, and a further three washes with acetonitrile:ammonium, 30 min each.  
750 Gel pieces were dehydrated again with acetonitrile before rehydration with 40  $\mu$ L trypsin  
751 (Pierce Trypsin Protease, MS-Grade, catalog no. 90058) working solution (100 ng trypsin in  
752 50 mM ammonium bicarbonate, 5% (v/v) acetonitrile). Where required, gel pieces were  
753 covered with 50 mM ammonium bicarbonate to a final volume before incubation at 37 °C  
754 overnight. Tryptic peptides were extracted from the gel pieces three times in an equal  
755 volume of 50% acetonitrile, 5% formic acid (Pierce LC-MS-Grade, catalog no. 85178), 30 min  
756 each. Extracted peptides were dried in a speed-vac and resuspended in (v/v) 2%  
757 acetonitrile/0.2% trifluoroacetic acid (Merck, catalog no. 302031). A total of four biological  
758 replicates for each sample type was submitted.

759

### 760 ***LC-MS/MS Analysis***

761 Approximately 35% of each sample was analysed using an Orbitrap Fusion™ Tribrid™ Mass  
762 Spectrometer (Thermo Fisher Scientific) coupled to a U3000 nano-UPLC (Thermo Fisher



763 Scientific). The dissolved peptides were injected onto a reverse phase trap column  
764 NanoEase m/z Symmetry C18, beads diameter 5  $\mu\text{m}$ , inner diameter 180  $\mu\text{m}$  x 20 mm length  
765 (Waters). The column was operated at the flowrate 20 $\mu\text{l}/\text{min}$  in 2% acetonitrile, 0.05% TFA,  
766 after 2.5min the trap column was connected to the analytical column NanoEase m/z HSS  
767 C18 T3 Column, beads diameter 1.8  $\mu\text{m}$ , inner diameter 75  $\mu\text{m}$  x 250 mm length (Waters).  
768 The column was equilibrated with 3% B (B: 80% acetonitrile in 0.05% formic acid (FA), A:  
769 0.1% FA) before subsequent elution with the following steps of a linear gradient: 2.5min 3%  
770 B, 5min 6.3% B, 13min 12.5% B, 50min 42.5% B, 58min 50% B, 61min 65% B, 63min 99% B,  
771 66min 99% B, 67min 3% B, 90min 3% B. The flow rate was set to 200 nL/min. The mass  
772 spectrometer was operated in positive ion mode with nano-electrospray ion source.  
773 Molecular ions were generated by applying voltage +2.2kV to a conductive union coupling  
774 the column outlet with fused silica PicoTip emitter, ID 10  $\mu\text{m}$  (New Objective, Inc.) and the  
775 ion transfer capillary temperature was set to 275°C. The mass spectrometer was operated in  
776 data-dependent mode using a full scan, m/z range 300–1,800, nominal resolution of  
777 120,000, target value  $1 \times 10^6$ , followed by MS/MS scans of the 40 most abundant ions.  
778 MS/MS spectra were acquired using normalized collision energy of 30%, isolation width of  
779 1.6 m/z, resolution of 120,000, and a target value set to  $1 \times 10^5$ . Precursor ions with charge  
780 states 2-7 were selected for fragmentation and put on a dynamic exclusion list for 30  
781 seconds. The minimum automatic gain control target was set to  $5 \times 10^3$  and intensity  
782 threshold was calculated to be  $4.8 \times 10^4$ . The peptide match feature was set to the  
783 preferred mode and the feature to exclude isotopes was enabled.

784

785 ***Data Processing and Peptide Identification***

786 Peak lists in the form of Mascot generic files were prepared from raw data files using MS  
787 Convert (Proteowizard) and sent to a peptide search on Mascot server v2.7 using Mascot  
788 Daemon (Matrix Science, Ltd.) against an in-house contaminants database and the Araport  
789 11 protein database. Tryptic peptides with up to 1 possible mis-cleavage and charge states  
790 +2, +3 were allowed in the search. The following peptide modifications were included in the  
791 search: carbamidomethylated Cysteine (fixed) and oxidized Methionine (variable). Data  
792 were searched with a monoisotopic precursor and fragment ion mass tolerance 10 ppm and  
793 0.8 Da respectively. Decoy database was used to validate peptide sequence matches.  
794 Mascot results were combined in Scaffold v4.4.0 (Proteome Software Inc.) and peptide and  
795 protein identifications accepted if peptide probability and protein threshold was  $\geq 80.0\%$   
796 and 99% respectively. Under these conditions the False Discovery Rate was 0.47%. Data was  
797 then exported to Excel (Microsoft) for further processing. Proteins were accepted if  
798 identified by at least 2 peptides and present in 2 or more biological replicates. Spectral  
799 counts from the 4 biological replicates were summed and used to derive a ratio of CTNIP4  
800 treatment:mock treatment. The mass spectrometry proteomics data have been deposited  
801 to the ProteomeXchange Consortium via the PRIDE (Perez-Riverol et al., 2016) partner  
802 repository with the dataset identifier PXD029264 and 10.6019/PXD029264

803

#### 804 **Transient expression in *Nicotiana benthamiana***

805 *Agrobacterium tumefaciens* strain GV3101 transformed with the appropriate construct were  
806 grown overnight in L-media and spun-down. The bacteria were resuspended in 10 mM  
807 MgCl<sub>2</sub> and adjusted to O.D.<sub>600</sub> = 0.2 prior to infiltration into the youngest fully expanded  
808 leaves of 3-week-old plants. Leaf disks were collected 24 h later, and calcium assays were

809 performed as described for seedlings with leaf disks being floated overnight in the dark in  
810 20  $\mu$ M coelenterazine (EC14031, Carbosynth).

811

### 812 ***Protein expression and purification***

813 The ectodomains expressed and purified were coded from Arabidopsis genes *HSL3* (22-627,  
814 AT5G25930) and *BAK1* (residues 20 – 637, AT4G33430). Codon-optimised synthetic genes  
815 were cloned into a modified pFastBac vector (Geneva Biotech) vector, providing a TEV  
816 (tobacco etch virus protease) cleavable C-terminal StrepII-9xHis tag. Expression of HSL3 and  
817 BAK1 was driven by the signal peptides 30K (Futatsumori-Sugai and Tsumoto, 2010) or  
818 *Drosophila BiP* (Smakowska-Luzan et al., 2018), respectively. The baculovirus were generated  
819 in DH10 cells and *Spodoptera frugiperda* Sf9 cells were used for viral amplification. For protein  
820 expression *Trichoplusia ni* Tnao38 cells (Hashimoto et al., 2012), were infected with HSL3 and  
821 BAK1 viruses with a multiplicity of infection (MOI) of 3. The cells were grown 1 day at 28 °C  
822 and two days at 22 °C at 110 rpm The secreted proteins were purified separately by sequential  
823 Ni<sup>2+</sup> (HisTrap excel, GE Healthcare, equilibrated in 25 mM KP<sub>i</sub> pH 7.8 and 500 mM NaCl) and  
824 StrepII (Strep-Tactin Superflow high-capacity, (IBA, Germany) equilibrated in 25 mM Tris pH  
825 8.0, 250 mM NaCl, 1 mM EDTA) affinity chromatography. Recombinant Strep-tagged TEV  
826 protease was used in 1:50 ratio to remove the affinity tags. The cleaved tag and the protease  
827 were separated from the protein ectodomains by Ni<sup>2+</sup> affinity chromatography. Proteins were  
828 further purified by size exclusion chromatography on a Superdex 200 Increase 10/300 GL  
829 column (GE Healthcare) equilibrated in 20 mM citric acid pH 5.0, 150 mM NaCl. Peak fractions  
830 containing the complex were concentrated using Amicon Ultra concentrators (Millipore,  
831 MWCO 10,000 for BAK1 and 30,000 for HSL3). Proteins were analysed for purity and structural  
832 integrity by SDS-PAGE.

833

834 ***Isothermal titration calorimetry (ITC)***

835 A MicroCal PEAQ-ITC (Malvern Instruments) was used to performing the ITC binding assays.

836 Experiments were performed at 25 °C with a 200 µL standard cell and a 40 µL titration syringe.

837 HSL3 and BAK1 proteins were gel-filtrated into pH 5 ITC buffer (20 mM sodium citrate pH 5.0,

838 150 mM NaCl). Protein concentrations for HSL3 and BAK1 were calculated using their molar

839 extinction coefficient and a calculated molecular weight of ~75,000 for HSL3 and ~ 25,000 Da

840 for BAK1. Experiments were performed with 20µM of HSL3 protein in the cell and between

841 200-450 µM of indicated peptide ligand in the syringe, following an injection pattern of 2 µL

842 at 150 s intervals and 500 r.p.m. stirring speed. The BAK1 vs HSL3- peptide experiments were

843 performed by titrating 100 µM of BAK1 in the cell, using the same injection pattern. ITC data

844 were corrected for the heat of dilution by subtracting the mixing enthalpies for titrant solution

845 injections into protein free ITC buffer. Experiments were done in replicates and data were

846 analyzed using the MicroCal PEAQ-ITC Analysis Software provided by the manufacturer. All

847 ITC runs used for data analysis had an N ranging from 0.7 to 1.3. The N values were fitted to

848 1 in the analysis.

849

850 ***RNA sequencing and qRT-PCR***

851 Two 3-day-old seedlings per well were transferred into transparent 24-well plates (Grenier

852 Bio-One) containing 1 mL liquid MS media, sealed with porous tape and grown for a further 9

853 days. For qRT-PCR seedlings were harvested at this point. For RNA-seq experiments media

854 was then exchanged for 500 µL fresh MS media and left overnight. In the morning a further

855 480 µL of fresh media was added. 9.5 h later 20 µL treatment/mock was added and seedlings

856 were harvested after 30 min. All seedlings were ground in liquid nitrogen.

857 Total RNA was extracted using Trizol reagent (Merck) according to the manufacturer's  
858 instructions and DNAase/RNA cleanup treatment was performed using the RNeasy kit  
859 (Qiagen). RNA sequencing was performed by Novogene. The RNA-seq datasets generated and  
860 analysed in the current study have been deposited in the ArrayExpress database at EMBL-EBI  
861 ([www.ebi.ac.uk/arrayexpress](http://www.ebi.ac.uk/arrayexpress)) under accession number E-MTAB-11093. qRT-PCR was  
862 performed on cDNA synthesised using The RevertAid first strand cDNA synthesis kit  
863 (Thermofisher) according to the manufacturer's instructions. cDNA was amplified by  
864 quantitative PCR using SYBR Green JumpStart Taq ReadyMix (Roche) and the CFX96 Real-Time  
865 PCR Detection System (Bio-Rad Laboratories, Hercules, CA, USA).

866 The read data were analysed using FastQC, trimmed using trimmomatic (Bolger et al.,  
867 2014) and mapped to the *Arabidopsis* TAIR10 genome via TopHat2 (Andrews et al., 2015; Kim  
868 et al., 2013). The mapped reads were assigned to genes by featureCounts from package  
869 Rsubread in R (Liao et al., 2019), and differential expression analysis was performed using  
870 DESeq2 with ashR L2FC shrinkage (Love et al., 2014; Stephens, 2017). Changes in gene  
871 expression were visualised using the R package ComplexHeatmap (Gu et al., 2016).

872

### 873 ***GO enrichment***

874 GO term enrichment was calculated using the R package topGO (Alexa and Rahnenfuhrer,  
875 2021), with arguments method= weight.01 and statistic=Fisher.

876

### 877 ***Correlation of expression***

878 Pairwise comparisons of gene expression differences ( $\log_2(\text{FC})$ ) was performed in R using the  
879 rcorr function from package Hmisc (Harrell Jr, 2021), type=Spearman, and correlations were  
880 plotted using corrplot (Wei and Simko, 2021).

881

882

883 ***Genome data retrieval***

884 Whole genome sequences and protein sequences were retrieved from Ensembl (release 50),  
885 Phytozome (version 13), NCBI, and marchantia.info. Species and individual assembly versions  
886 are listed in Supplementary file 6 (SI\_table\_species\_data.csv).

887

888 ***CTNIP identification***

889 *Peptide search*

890 Protein sequences from all species were first filtered for a maximum length of 300 amino  
891 acids and merged into a single file. The initial set of CTNIP peptide sequences is given in  
892 Supplementary file 7 (SI\_data\_initial\_CTNIP\_candidates.fasta). Additional candidates were  
893 searched with 1) jackhmmer (version 3.1b2, (Eddy, 2011)), 2) diamond (version 0.9.26,  
894 options -e 1e-8 -k 100, (Buchfink et al., 2014)), and 3) hmm profile search (3.1b2, (Wheeler  
895 and Eddy, 2013)). For the hmm profile search, the initial set of candidates and the candidates  
896 from the diamond search were aligned with muscle (v3.8.31, (Edgar, 2004)) to generate an  
897 hmm profile (hmmbuild) that was then used to search more candidates (hmmsearch).  
898 Candidates from all approaches were merged and grouped with a sequence similarity  
899 network. For this, sequences were matched to each other with diamond (options -e 0.01 -k  
900 100). The pairwise percent similarity scores above 20 % were used to construct a network.  
901 The community structure of the network was resolved with a modularity optimization  
902 algorithm (Blondel et al., 2008) implemented by the function cluster\_louvain in the R package  
903 igraph (version 1.0.1, (Csardi and Nepusz, 2006)). Candidates within the same communities  
904 as the original candidate sequences were used as protein candidates.

905 *DNA search*

906 To search novel peptides that were previously not annotated, we extracted all transcript  
907 sequences of the protein candidates and aligned them with muscle to generate an HMM  
908 profile (hmmbuild) that was used to search all genomes with nhmmer (3.1b2,(Wheeler and  
909 Eddy, 2013)). Candidate regions were filtered for already annotated genes and used as input  
910 to restrict *de novo* gene prediction with Augustus (version 3.3.3, (Stanke et al., 2008)). Finally,  
911 candidates from both, protein and DNA search, were merged to generate the final set of  
912 CTNIP candidates (Supplementary file 8 (CTNIP\_relaxed.align)). This "relaxed" set of  
913 candidates was further filtered for having two Cysteins with a 9-11 amino acid spacing. Few  
914 candidates were also removed by a visual inspection of the alignment, resulting in the  
915 "confident" CTNIP candidates (Supplementary file 9 (CTNIP\_confident.align)). Phylogeny and  
916 clade identification was done with the "relaxed" set of candidates using muscle and FastTree  
917 (version 2.1.11 SSE3, option -lg, (Price et al., 2010)) using an age cutoff of 9. The resulting  
918 phylogenetic tree was rooted using a similar sequence from *M. polymorpha* (chr5:16052258-  
919 16053618) as outgroup with gotree (v0.4.2, (Lemoine and Gascuel, 2021)) and graphically  
920 represented using FigTree (v1.4.3, <http://tree.bio.ed.ac.uk/software/figtree>). The sequence  
921 logo was generated with the alignment of the "confident" CTNIP candidates and the R-  
922 package ggseqlogo (v.1, (Wagih, 2017)). Amino acids with a low occurrence (i.e., seen in less  
923 than 5 % of the peptides) were trimmed from the alignment to generate a gap-free logo.

924

925

926 ***RK identification***

927 Protein sequences from all species were first filtered for a minimum length of 500 amino acids  
928 and merged into a single file. The initial set of RK sequences was taken from the alignment

929 provided by Furumizu et al. (2021), but with the outgroups removed (*P. margaritaceum*, *S.*  
930 *muscicola*, and *M. endlicherianum*). The sequences are given in Supplementary file 10  
931 (SI\_data\_initial\_RK\_candidates.fasta). Sequences were aligned with muscle to build and  
932 search an HMM profile (hmmsearch options -E 1e-10 --incE 1e-10). Candidates were matched  
933 to each other with diamond (options -e 1e-11 --id 20 --query-cover 80). The pairwise percent  
934 similarity scores above 50 % were used to construct a network and communities were defined  
935 as described as above. Likewise, only candidates within the same communities as the original  
936 candidates were kept. Candidates were further filtered for the presence of an LRR and a  
937 kinase domain with hmmsearch (options -E 1e-5) and PFAMv33 (Supplementary file 11  
938 (RECEPTOR.align)). Phylogeny and clade identification was done with muscle and FastTree  
939 (option -lg) using an age cutoff of 5.5. The resulting phylogenetic tree was rooted using the  
940 sequences from *P. margaritaceum* as outgroup (Furumizu et al., 2021).

941

#### 942 ***Phylogenetic tree of all species***

943 The species tree was calculated using OrthoFinder (v2.5.4, (Emms and Kelly, 2019)) with all  
944 protein sequences of all plants species.



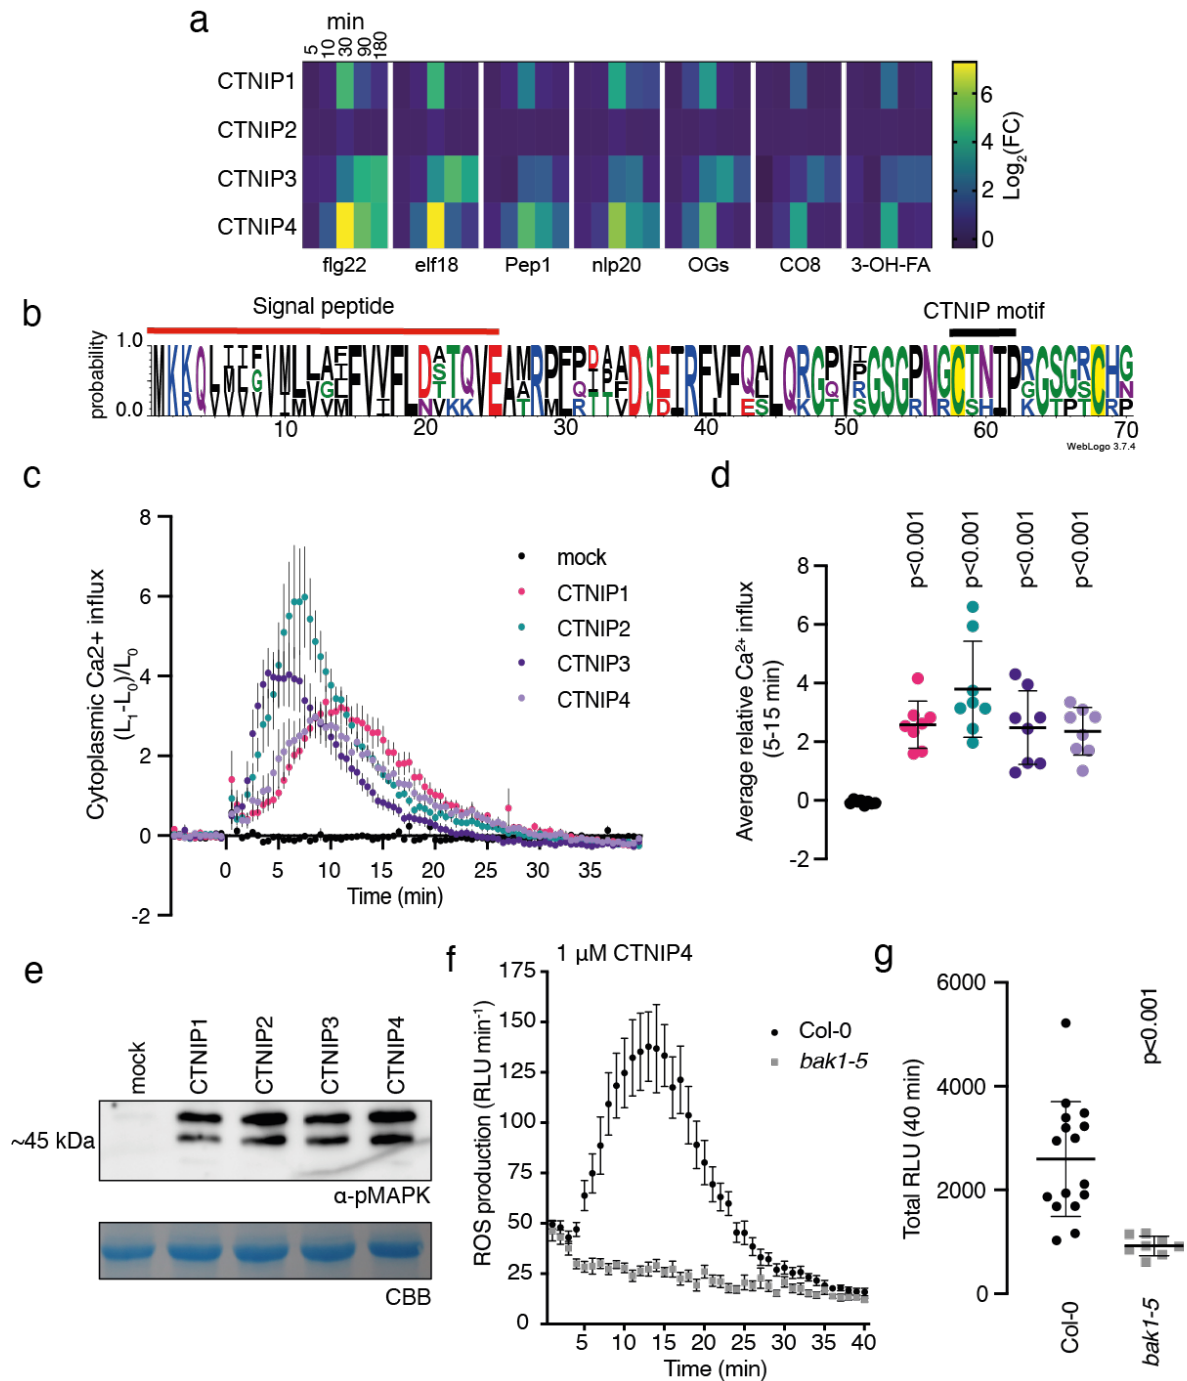

**Figure 1. CTNIPs are a novel family of plant signalling peptide**

(a) Heat map showing log<sub>2</sub>(FC) expression levels of CTNIP1-4 in response to a range of elicitors (data obtained from Bjornson *et al.* (2021)).

(b) Sequence probability logo from *Arabidopsis* CTNIP1-4 generated using WebLogo3.

Signal peptide (as predicted by SignalP5.0) and CTNIP motif are indicated, and conserved

cysteine residues are highlighted in yellow. Amino acids are coloured based on their biochemical properties: red = acidic; blue= basic; black = hydrophobic and green = polar.

**(c-d)** cytoplasmic calcium influx measured in *p35S::AEQUORIN* seedlings after treatment with 1  $\mu$ M CTNIP relative to pre-treated levels ( $n = 8$  seedlings). (c) Points represent mean; error bars represent S.E.M. (d) represents mean relative  $Ca^{2+}$  influx between 5 and 15 min.

A line represents mean; error bars represent S.D. *P*-values indicate significance relative to the WT control in a Dunnett's multiple comparison test following one-way ANOVA.

**(e)** Western blot using  $\alpha$ -p42/p44-ERK recognizing phosphorylated MAP kinases in seedlings treated with 100 nM CTNIPs or mock for 15 min. The membrane was stained with CBB, as a loading control.

**(f-g)** ROS production in leaf disks collected from 4-week-old Arabidopsis plants induced by 1  $\mu$ M CTNIP4 application ( $n \geq 8$ ). (f) Points represent mean; error bars represent S.E.M. (g) Integrated ROS production over 40 min. Line represents mean; error bars represent S.D. *P*-values indicate significance relative to the WT control in a two-tailed T-test.

All experiments were repeated and analysed three times with similar results. ROS, reactive oxygen species; CBB, Coomassie brilliant blue.

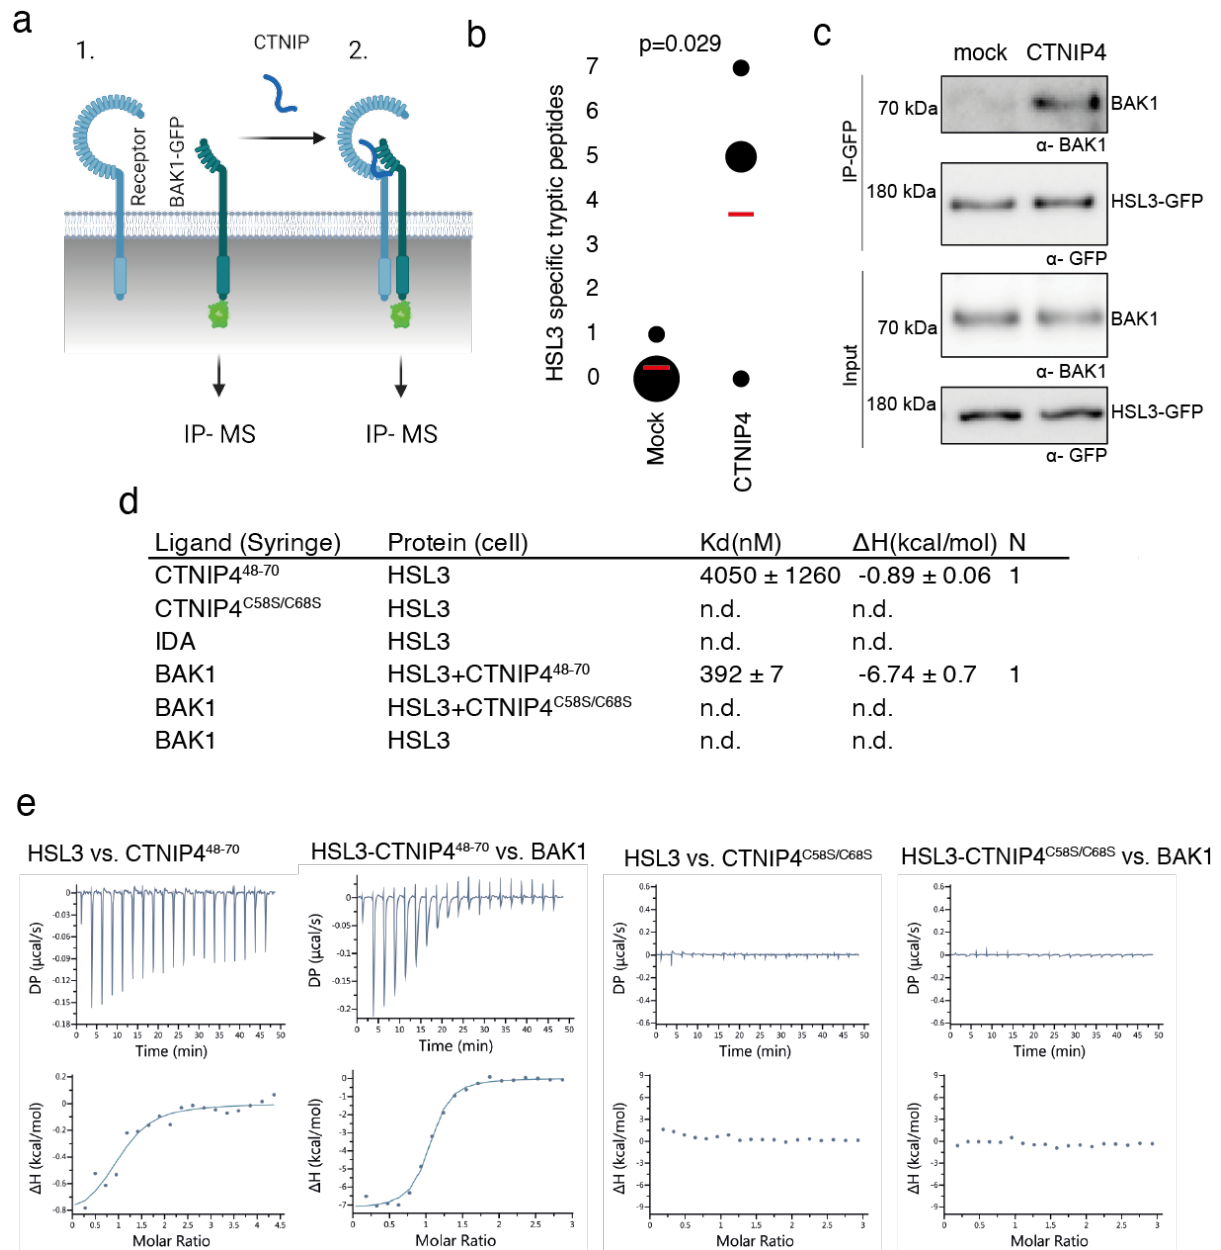

**Figure 2. HSL3 forms a CTNIP-induced receptor complex with BAK1**

(a) Schematic representation of BAK1-GFP immunoprecipitation in the (1) absence or (2) presence of CTNIP4 treatment to identify protein associations induced by CTNIP. Figure generated using Biorender.

(b) HSL3-specific spectral counts identified in four independent biological replicates where BAK1-GFP was pulled-down in the presence or absence of 1  $\mu$ M CTNIP4 treatment. Circle diameter is proportional to the number of replicates. Red lines indicate the mean

spectral counts for each treatment. *P*-values indicate significance relative to the untreated control in a two-tailed T-test.

(c) Co-immunoprecipitation of BAK1 with HSL3–GFP from HSL3-GFP seedlings treated with 1  $\mu$ M CTNIP4<sup>48-70</sup> or water for 10 min. Western blots were probed with antibodies  $\alpha$ -GFP and  $\alpha$ -BAK1. This experiment was repeated 3 three times with similar results.

(d) ITC summary table of HSL3 vs CTNP4<sup>48-70</sup>, CTNP4<sup>C58S/C68S</sup> and IDA peptides, and contribution of the BAK1 co-receptor to the ternary complex formation.  $K_d$ , (dissociation constant) indicates the binding affinity between the two molecules considered (nM). The N indicates the reaction stoichiometry (N=1 for a 1:1 interaction). The values indicated in the table are the mean  $\pm$  S.E.M. of two independent experiments.

(e) Isothermal titration calorimetry (ITC) experiments of HSL3 vs CTNIP4 and CTNIP4<sup>C58S/C68S</sup>, in the absence and presence of the co-receptor BAK1.

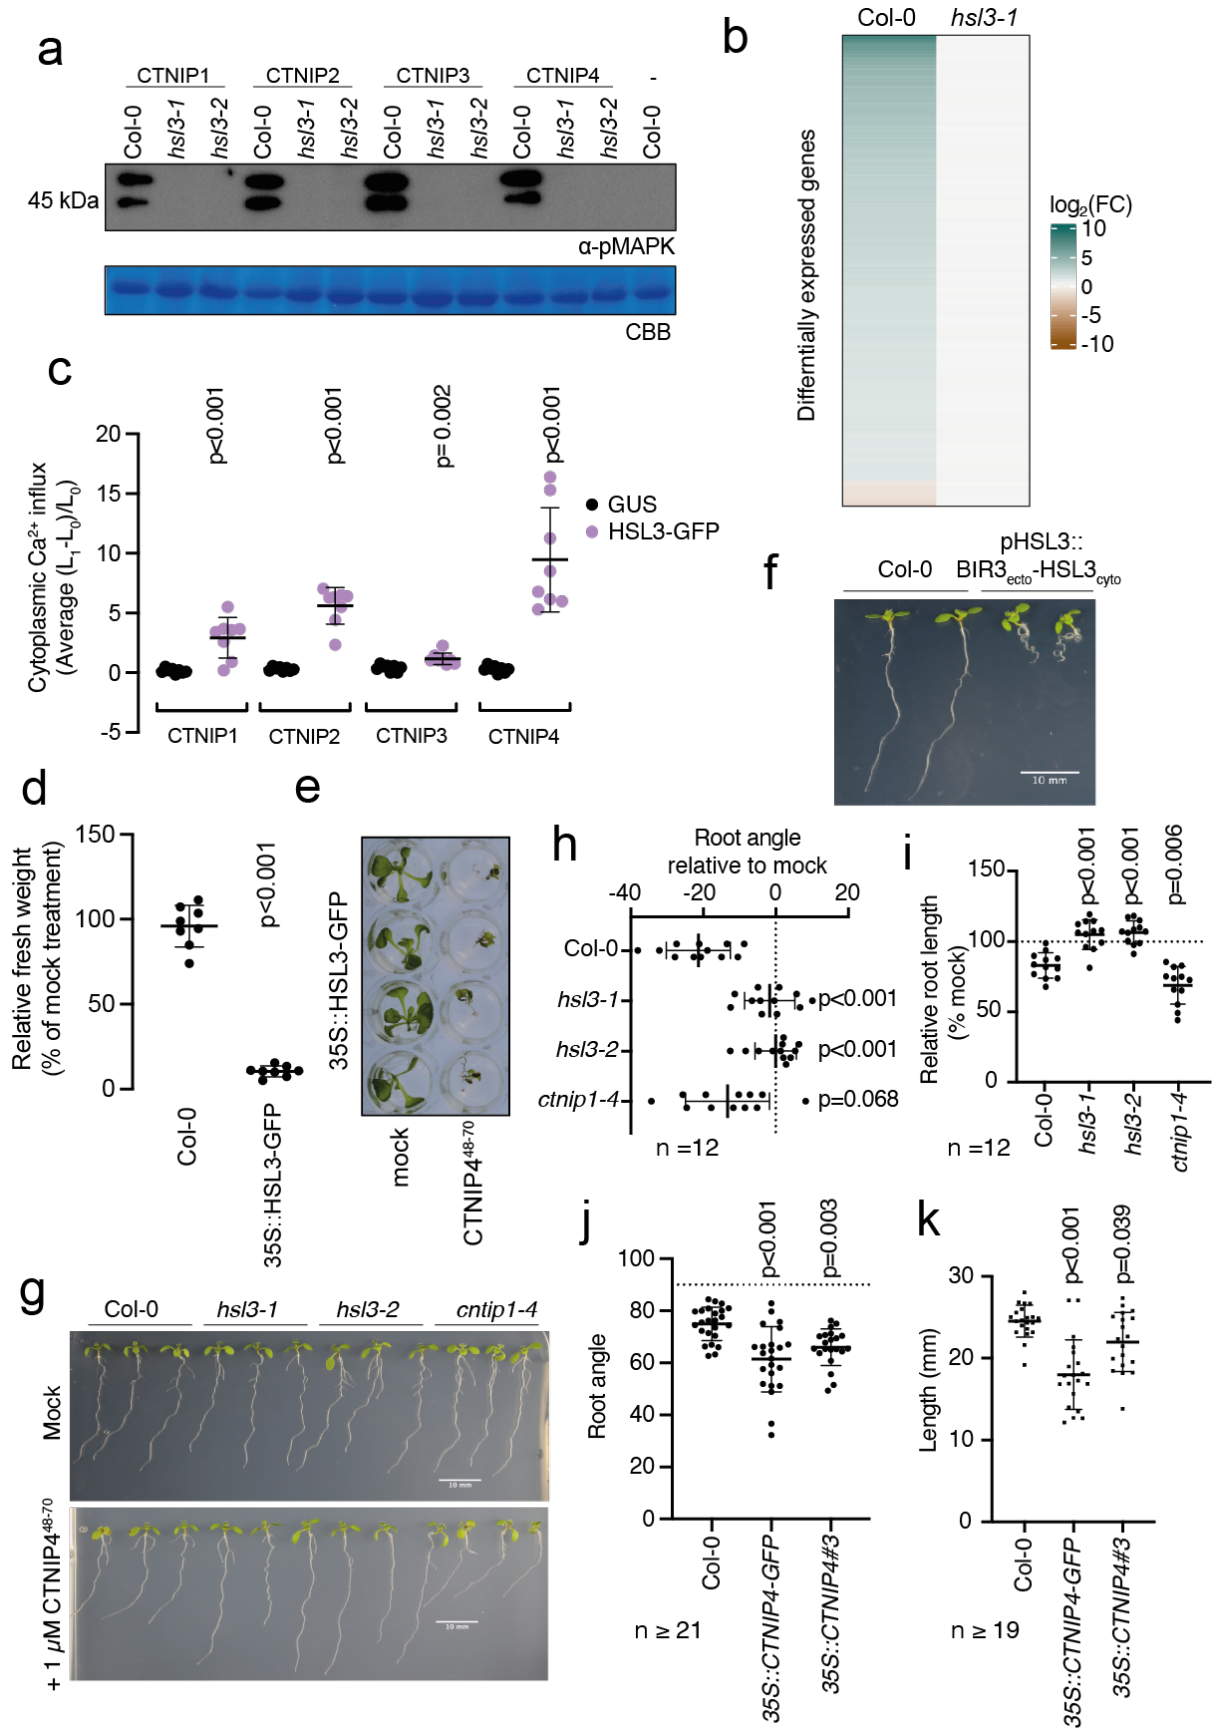

### Figure 3. HSL3 is strictly required for CTNIP perception and growth regulation

(a) Western blot using  $\alpha$ -p42/p44-ERK recognizing phosphorylated MAP kinases in seedlings treated with 100 nM CTNIPs or mock for 15 min. The membrane was stained with CBB, as a loading control.

(b) Heat map showing all significantly differentially expressed genes ( $p < 0.05$ ,  $|\text{Log}_2(\text{FC})| > 1$ ) in *Arabidopsis* WT or *hsl3-1* seedlings treated with or without 100 nM CTNIP4<sup>48-70</sup> for 30 min relative to a mock control.

(c) Mean relative cytoplasmic  $\text{Ca}^{2+}$  influx in leaf disks of *N. benthamiana* transiently expressing the defined constructs induced by 1  $\mu\text{M}$  CTNIP or mock application ( $n = 8$  leaf disks). A line represents mean; error bars represent S.D. *P*-values indicate significance relative to the GUS-transformed control in a Dunnett's multiple comparison test following one-way ANOVA.

(d) Fresh weight of 14-day-old seedlings grown in the presence of 500 nM CTNIP4 for 10 days relative to mock ( $n = 8$  seedlings). A line represents mean; error bars represent S.D. *P*-values indicate significance relative to the WT control in a two-tailed T-test.

(e) Representative images of (d).

(f-g) Nine-day-old vertically grown *Arabidopsis* seedlings on 1/2 MS agar medium with 1 % sucrose. Pictures were taken from the front of the plate.

(h-k) Root parameters were quantified from the base of the hypocotyl to the root tip using ImageJ (h) Root angle is shown relative to mock. Negative values indicate leftward root skewing. (j) Absolute root angle with  $90^\circ$  representing the gravity vector. Angles  $< 90^\circ$  represent skewing to the left. A line represents mean; error bars represent S.D. *P*-values indicate significance relative to the WT control in a Dunnett's multiple comparison test

following one-way ANOVA. All experiments were repeated and analysed three times with similar results.

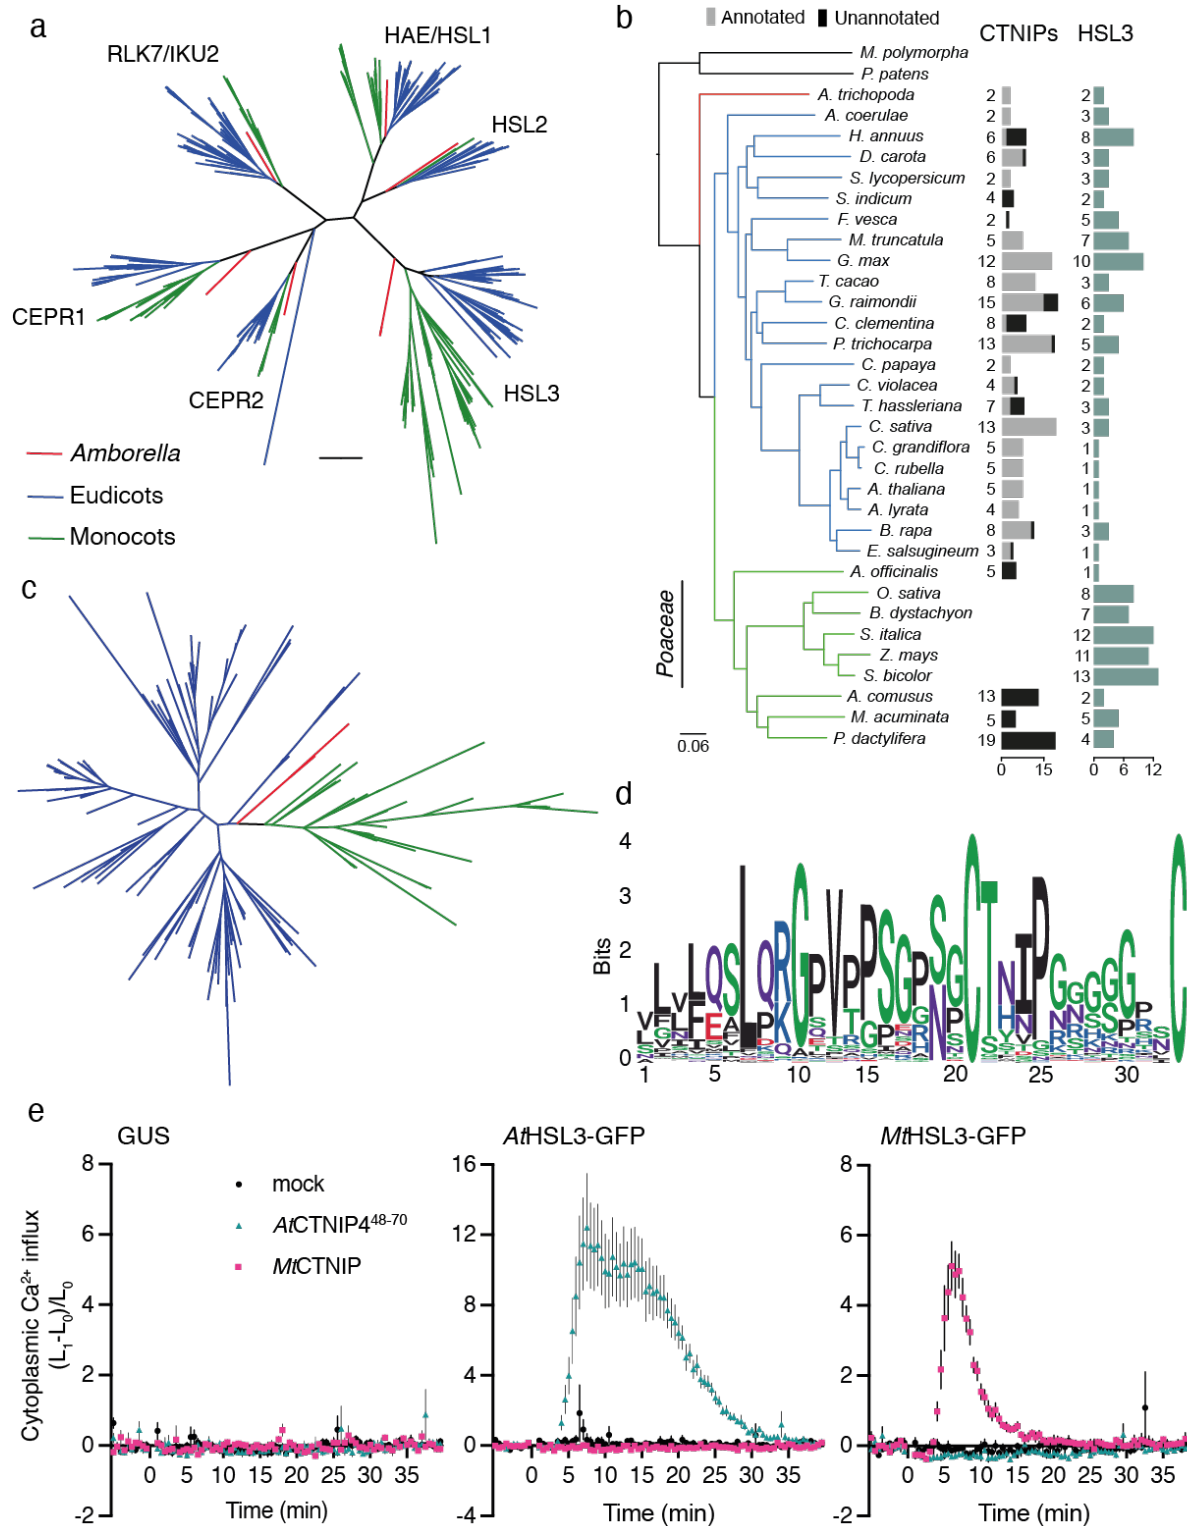

**Figure 4. The HSL3-CTNIP signalling module is ancient and conserved**

(a) Phylogeny of the full-length amino acid sequences of HAE/HSL/CEPR/RLK7/IKU2 clade of receptor kinases. Eudicot sequences are indicated in blue, monocot sequences in green and *Amborella* sequences in red. Clades are named based upon the *Arabidopsis* genes.



Alignment shown in Supplementary file 11. Further details of species, sequence identification, alignment and phylogeny generation are described in the material and methods.

**(b)** Species tree with number of CTNIP and HSL3 orthologs identified. Annotated CTNIPs are shown in grey whilst unannotated CTNIPs are shown in black. Sequences are shown in Supplementary file 9 and Supplementary file 11.

**(c)** Phylogeny of the full-length amino acid sequences of CTNIPs. Eudicot sequences are indicated in blue, monocot sequences in green and *Amborella* sequences in red. Sequences shown in Supplementary file 9. Further details of species, sequence identification, alignment and phylogeny generation are described in the material and methods.

**(d)** Sequence Logo generated from CTNIP alignment from (c) using the R-package ggseqlogo. Amino acids are coloured based on their biochemical properties: red = acidic; blue = basic; black = hydrophobic; purple = neutral and green = polar.

**(e)** Cytoplasmic calcium influx measured after treatment with 1  $\mu$ M CTNIP in *p35S::AEQUORIN N. benthamiana* leaf disks transiently expressing the defined construct, relative to pre-treatment ( $n = 8$  leaf disks). Points represent mean; error bars represent S.E.M. Experiments were repeated and analysed three times with similar results.

a

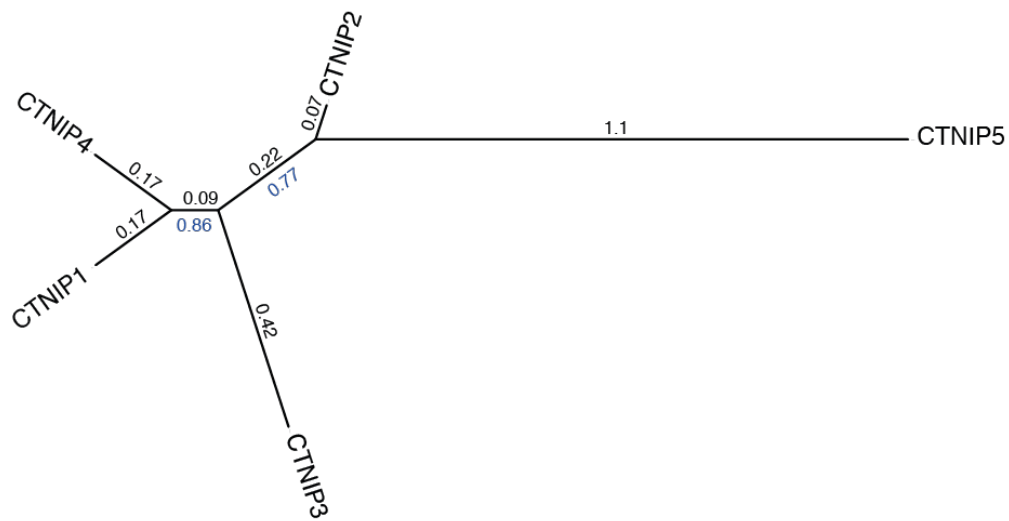

b

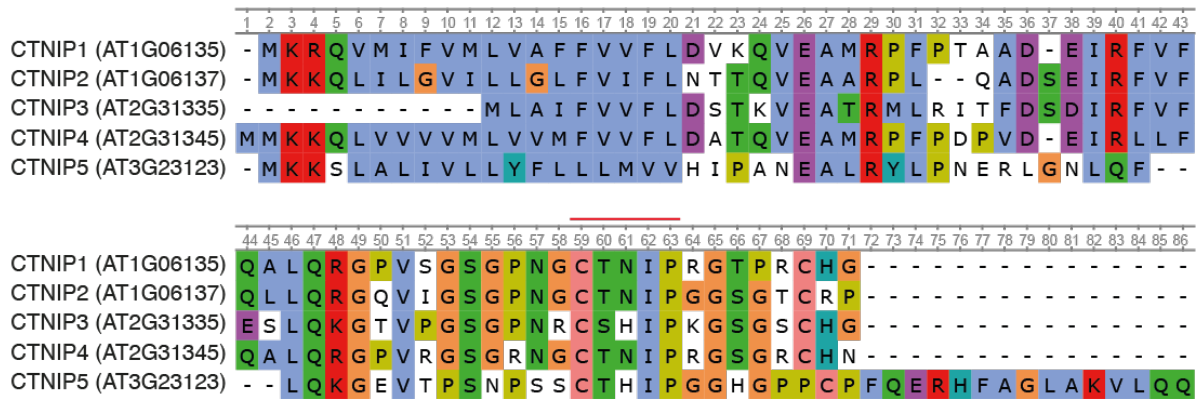

**Figure 1 – figure supplement 1. Alignment and phylogeny of *Arabidopsis* CTNIPs**

(a) Phylogeny of *Arabidopsis* CTNIPs. Full length protein sequences were aligned using MUSCLE and a phylogeny was inferred using the Maximum-likelihood method and JTT matrix-based model conducted in MEGAX. 1000 bootstraps were performed and values shown in blue. Branch lengths are shown in black.

(b) Alignment used to generate (a). CTNIP motif is highlighted in red.



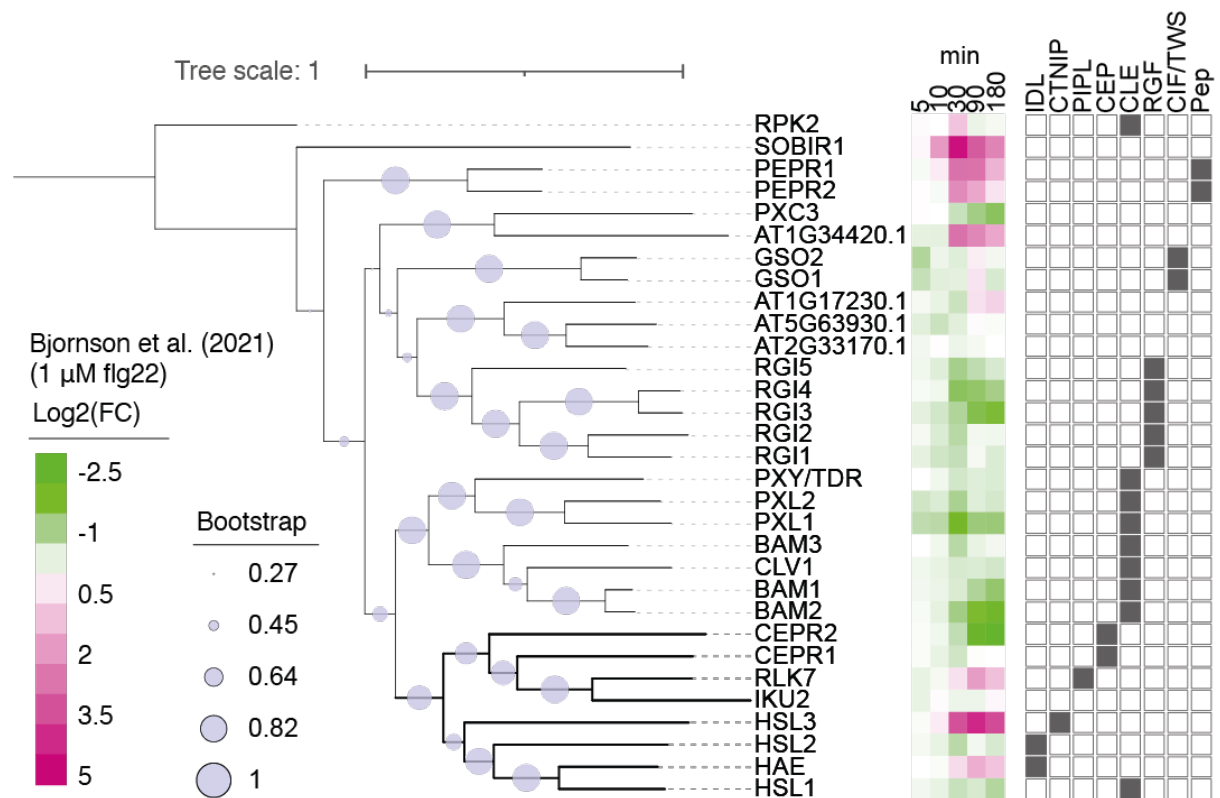

**Figure 2 – figure supplement 1. *Arabidopsis* LRR-RK subfamily XI**

Phylogeny of full-length protein sequences of the *Arabidopsis* LRR-RK subfamily XI. Sequences were aligned using MUSCLE and a phylogeny was inferred using the Maximum-likelihood method and JTT matrix-based model conducted in MEGAX. 1000 bootstraps were performed and are indicated based on the size of the blue circles. Expression of these receptors in response to 1  $\mu$ M flg22 treatment was extracted from Bjornson *et al.* (2021) and is represented in a heat map. Known ligands for LRR-RK subfamily XI are highlighted to the right (Butenko *et al.*, 2003; Cho *et al.*, 2008; Crook *et al.*, 2020; Doblasi *et al.*, 2017; Doll *et al.*, 2020; Hou *et al.*, 2014; Krol *et al.*, 2010; Morita *et al.*, 2016; Mou *et al.*, 2017; Nakayama *et al.*, 2017; Ogawa *et al.*, 2008; Okuda *et al.*, 2020; Ou *et al.*, 2016; Qian *et al.*, 2018; Rojo *et al.*, 2002; Santiago *et al.*, 2016; Shinohara *et al.*, 2016; Song *et al.*, 2016; Tabata *et al.*, 2014; Yamaguchi *et al.*, 2010, 2006; Zhang *et al.*, 2016).

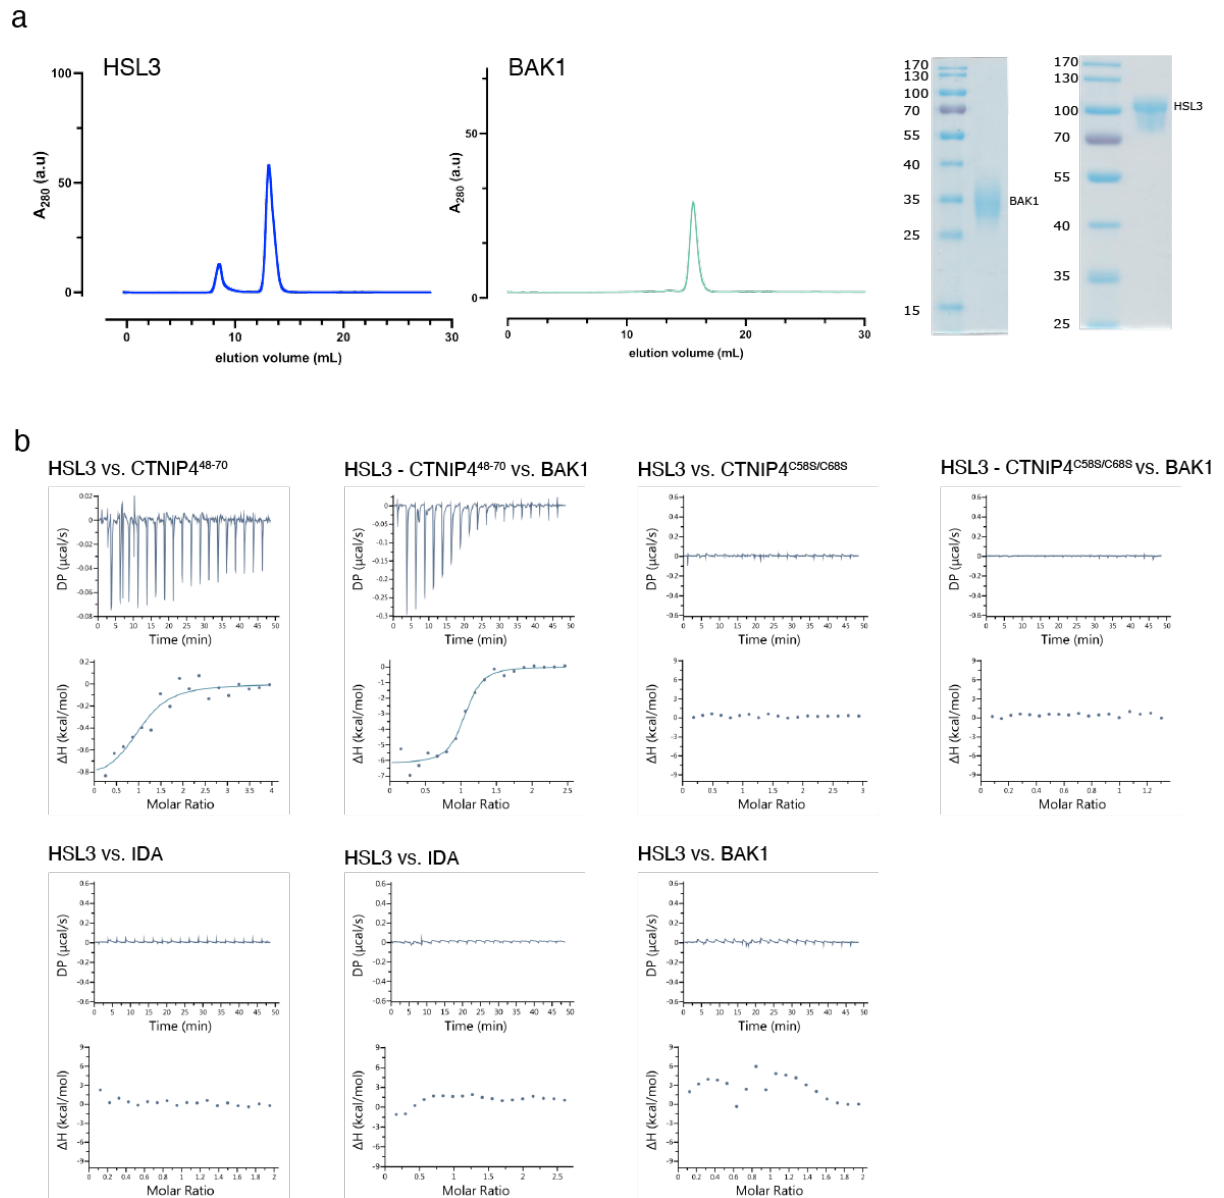

(a) Analytical size-exclusion chromatography (SEC) of the ectodomains of HSL3 and BAK1.

An SDS PAGE of the two proteins is shown alongside.

(b) ITC raw thermograms of experiments shown in the ITC table summary in Figure 2d.

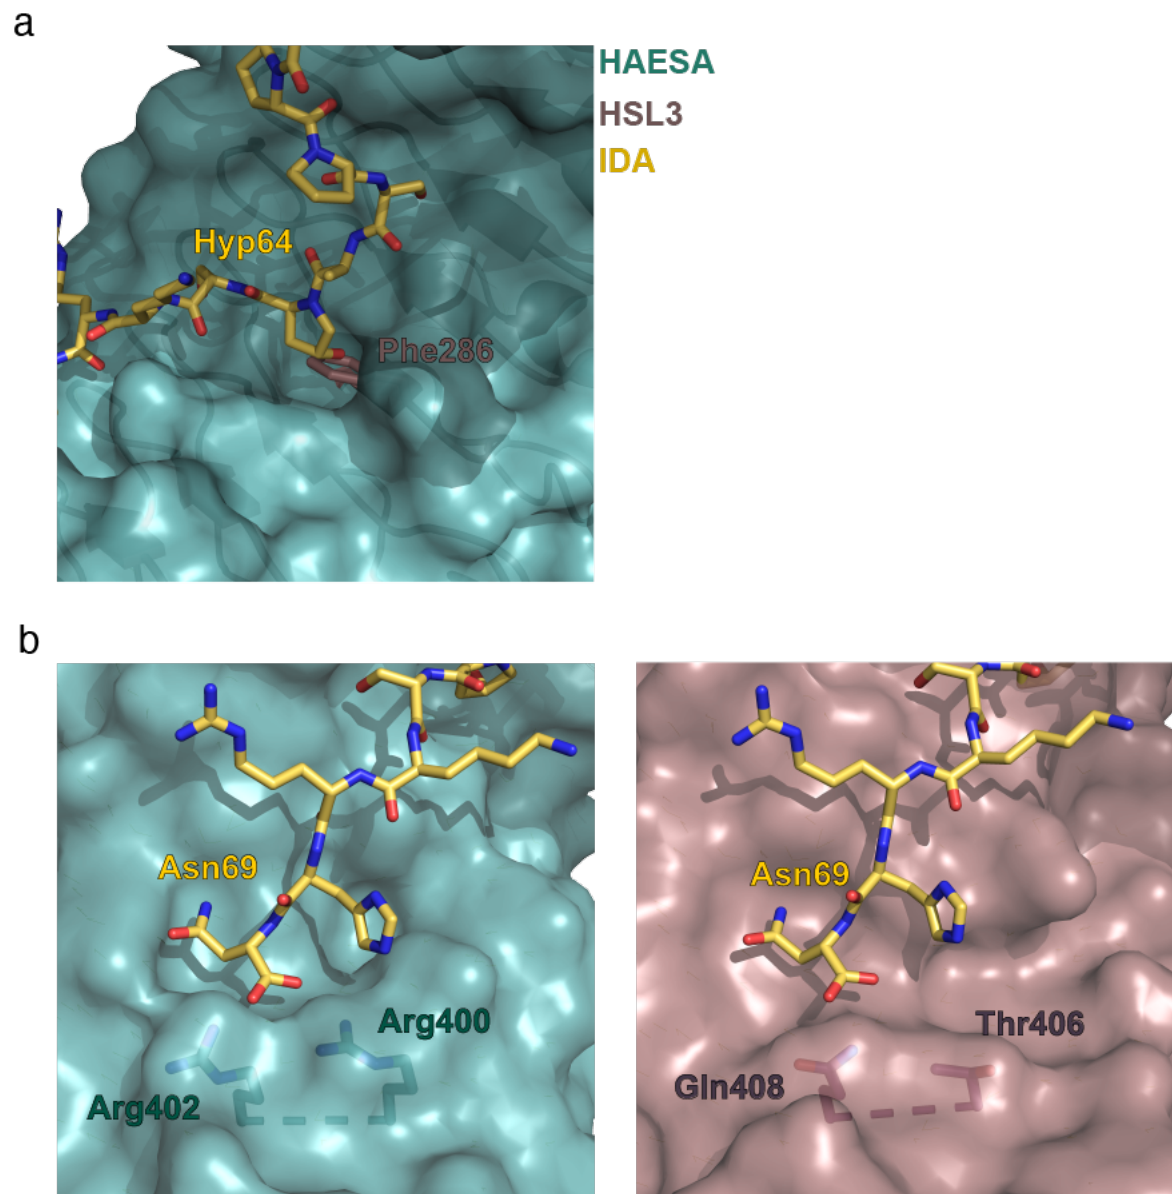

**Figure 2 – figure supplement 3. Structural comparison of the binding pockets between the receptors HAESA and HSL3**

(a) The hydroxyproline pocket required for anchoring the IDA peptide to the HAESA receptor is missing in HSL3. Close view of the binding pocket of the structural superimposition of the HAESA-IDA complex (PDB:5IXQ) and a homology model of HSL3 (AlphaFold: <https://alphafold.ebi.ac.uk/>). The HAESA receptor is depicted in surface representation in teal blue, IDA in yellow sticks and HSL3 in magenta cartoon. In HSL3, the

hydroxyproline pocket is replaced by the bulky residue Phe286, colliding with the potential anchoring of the IDA peptide to the receptor.

(b) The conserved RxR motif necessary for the coordination of the COO- group the last Asn in IDA is not present in the HSL3 receptor. Zoom in of the C-terminal region of the peptide binding surface of HAESA (teal blue) (left panel) and HSL3 (magenta) (right panel). In HAESA the motif RxR closes the binding pocket allowing for the coordination of the C-terminal of IDA. In HSL3 this structural motif is substituted by the residues Thr406 and Gln408, leaving the binding surface open to potentially accommodate a longer peptide ligand. Figures were done using the PyMOL Molecular Graphics System, Version 2.0 Schrödinger, LLC.

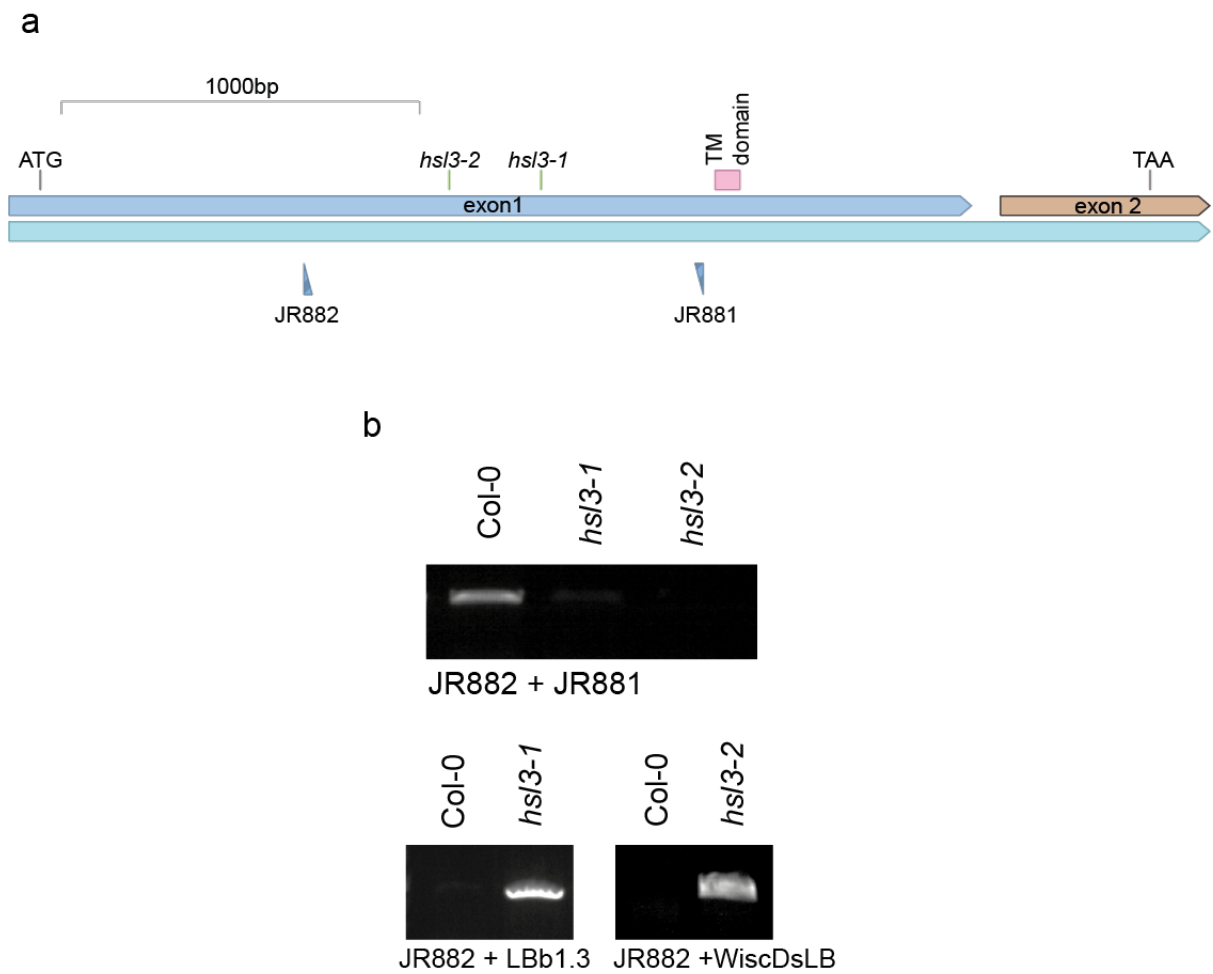

**Figure 3 – figure supplement 1. Genetic characterization of *hsl3* mutants**

(a) Gene model showing the location of T-DNA inserts.

(b) PCR confirming T-DNA insertion and mutant homozygosity.



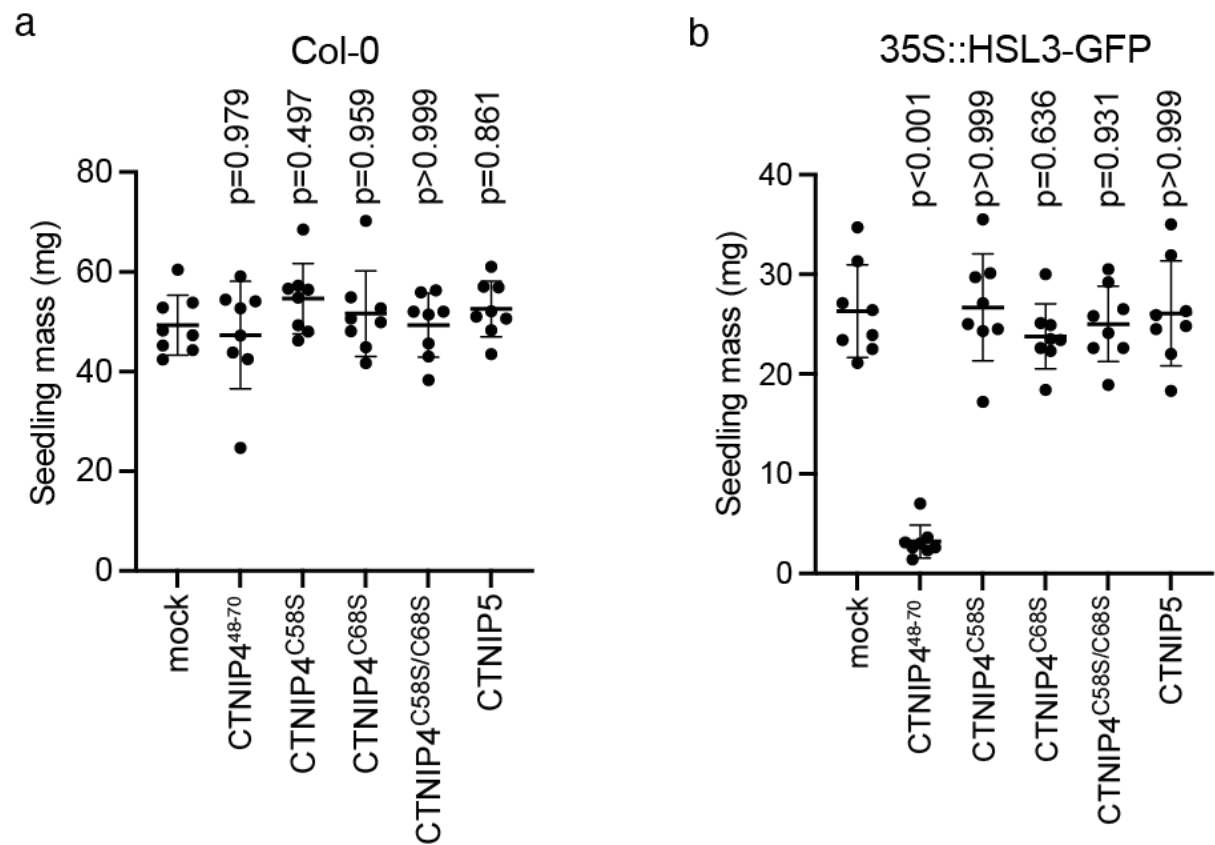

**Figure 3 – figure supplement 2. CTNIP-induced seedling growth inhibition**

(a-b) Fresh weight of 14-day-old seedlings grown in the presence of 500 nM CTNIPs for 10 days relative to mock ( $n = 8$  seedlings). A line represents mean; error bars represent S.D.;  $P$ -values indicate significance relative to the WT control in a Dunnett's multiple comparison test following one-way ANOVA.

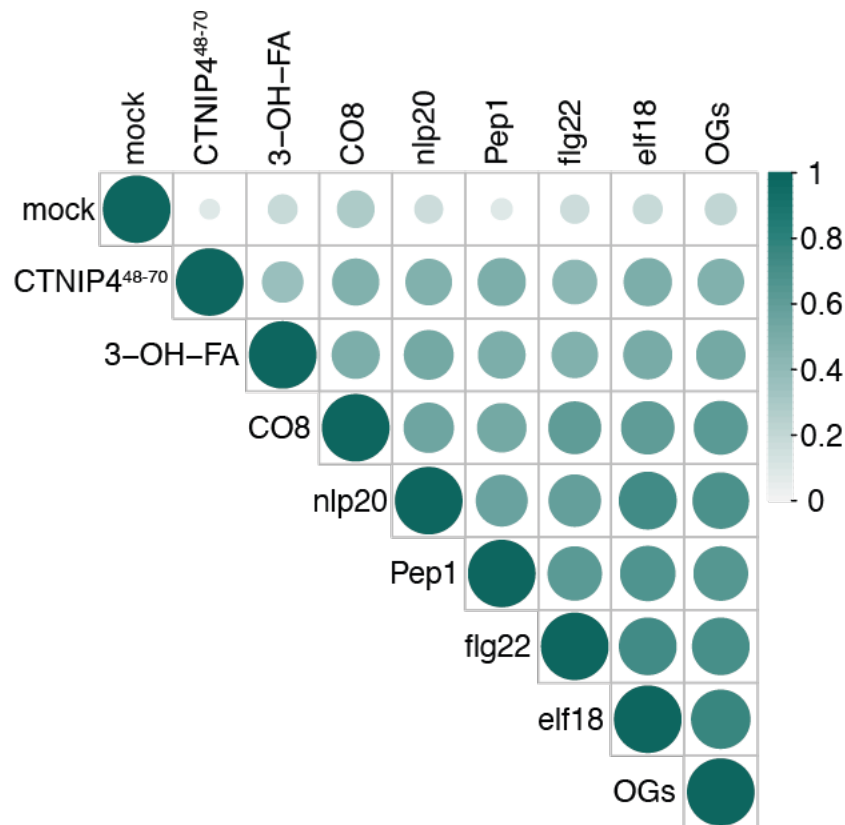

**Figure 3 – figure supplement 3. Correlation of CTINP4-induced transcriptomic response with that of elicitors at 30 min**

CTINP4-induced gene expression is well correlated with elicitor-induced gene expression from Bjornson *et al.* (2021). Circle colour and size are proportional to the Spearman correlation coefficient (R-squared value) of each pairwise comparison of  $\log_2$ (fold changes).

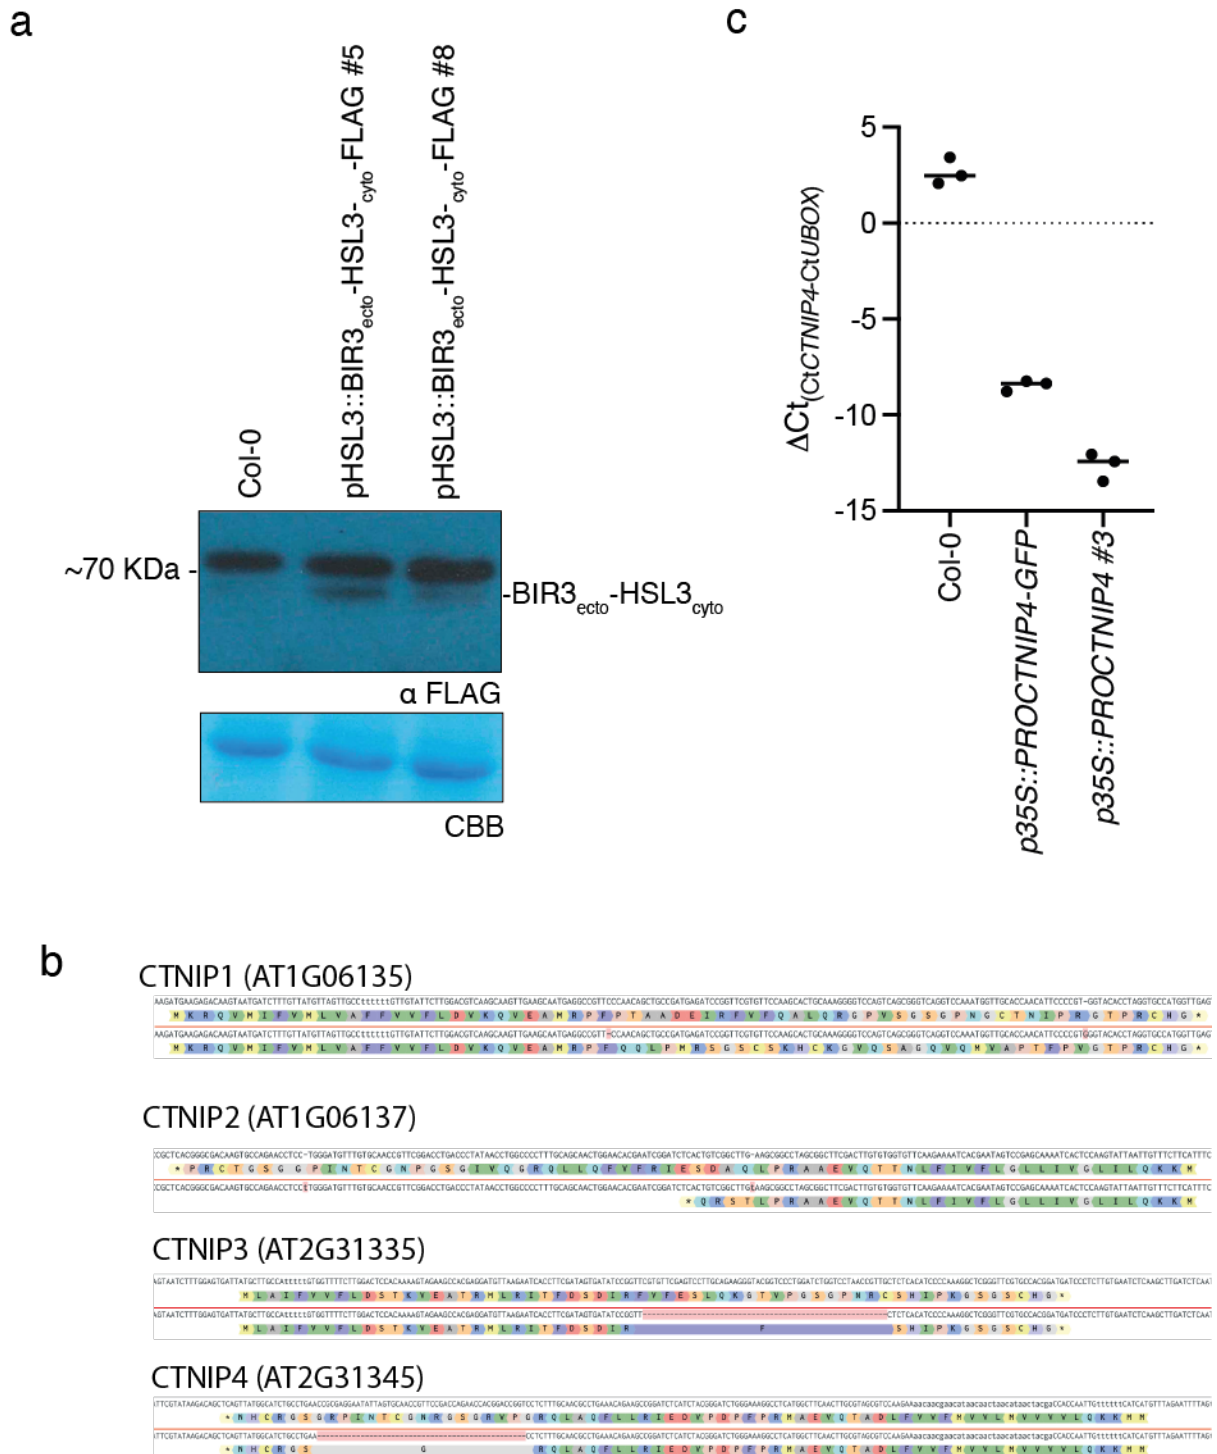

**Figure 3 – figure 4. Characterisation of CTNIP and chimeric receptor lines**

(a) Western blot using  $\alpha$ -FLAG recognizing BIR3<sub>ecto</sub>-HSL3<sub>cyto</sub>-FLAG in seedlings to confirm expression. The membrane was stained with CBB, as a loading control.

(b) Documentation of the Cas9-induced mutations observed within the *ctnip-4* polymutant and their predicted effects on protein products.

(c) qRT-PCR documenting the overexpression of CTNIP lines. Expression of *CTNIP4* is shown relative to *U-Box (At5g15400)*. Points represent independent biological replicates each comprising two technical replicates. Lines represent the mean of biological replicates.
